# Supplementary material for: MDM2 Regulation of HIF Signaling Causes Microvascular Dysfunction in Hypertrophic Cardiomyopathy
Source: PubMed Central journal article supplement — Circulation. 2023 Oct 27;148(23):1870–86. doi: 10.1161/CIRCULATIONAHA.123.064332 (PMC10691664; doi:10.1161/circulationaha.123.064332), 2023-10-27

# Full unedited gel for Figure 2A and 2C

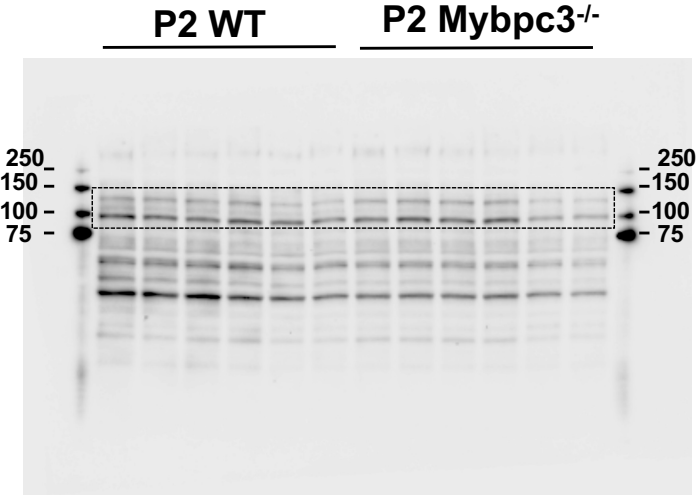

HIF1α

Figure 2A representative  
Figure 2C quantification

60 sec exposure/ECL substrate

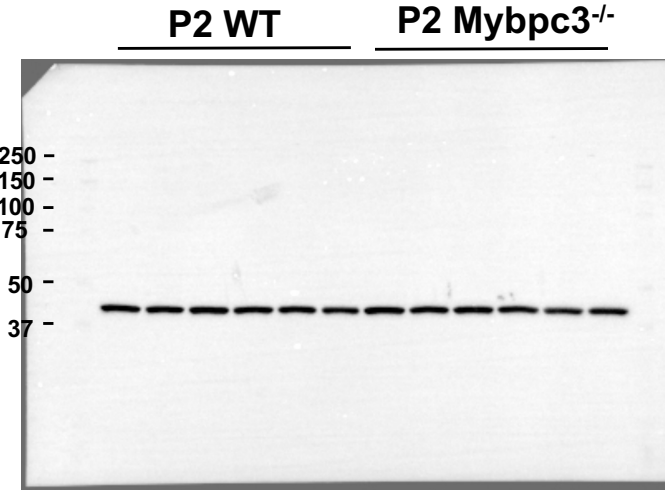

β-ACTIN

Figure 2A representative  
Figure 2C quantification

2 sec exposure/ECL substrate

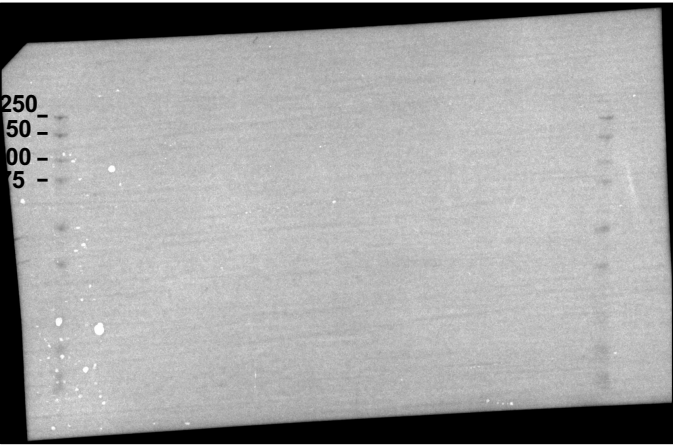

Colorimetric ladder

# Full unedited gel for Figure 2A and 2C

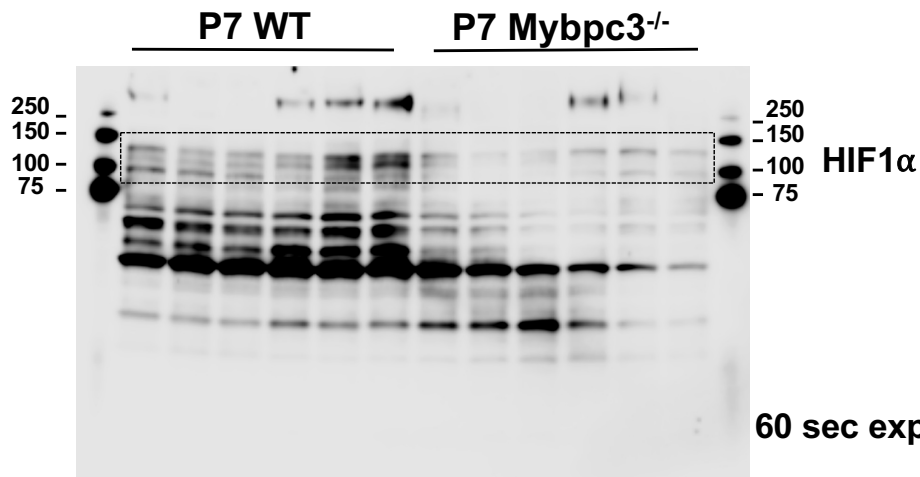

Figure 2A representative  
Figure 2C quantification

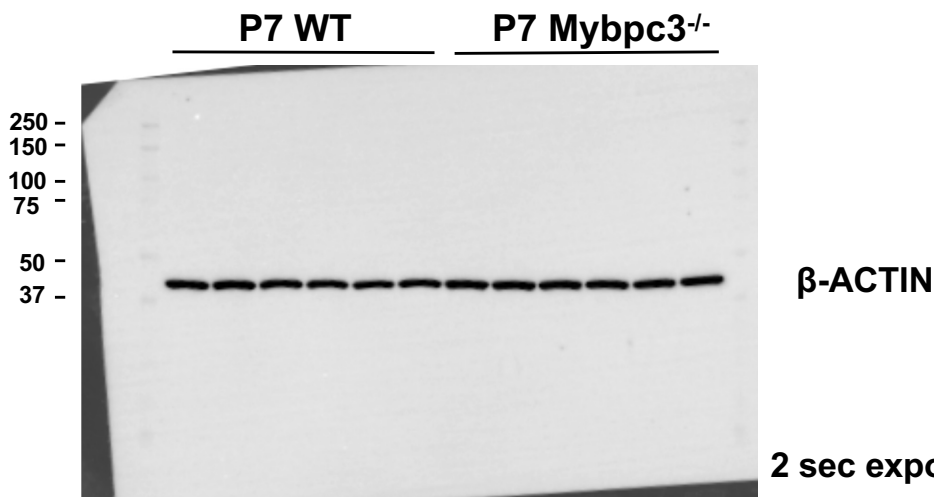

Figure 2A representative  
Figure 2C quantification

# Full unedited gel for Figure 2A and 2C

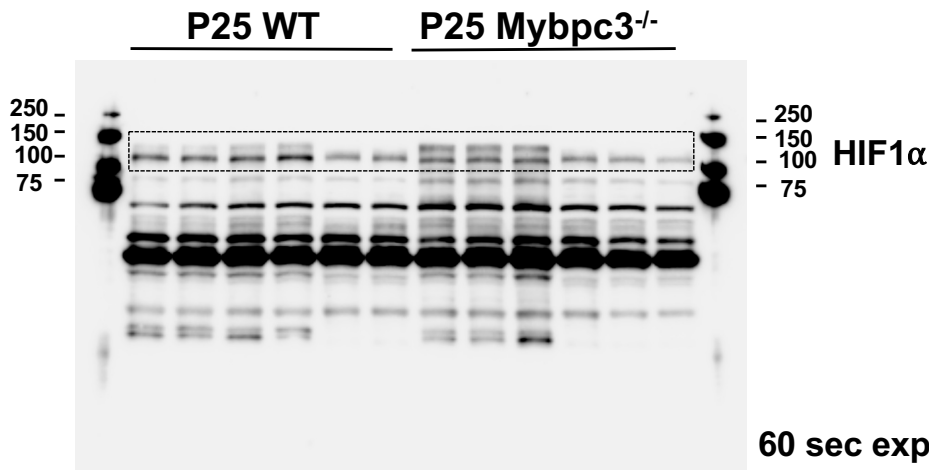

Figure 2A representative  
Figure 2C quantification

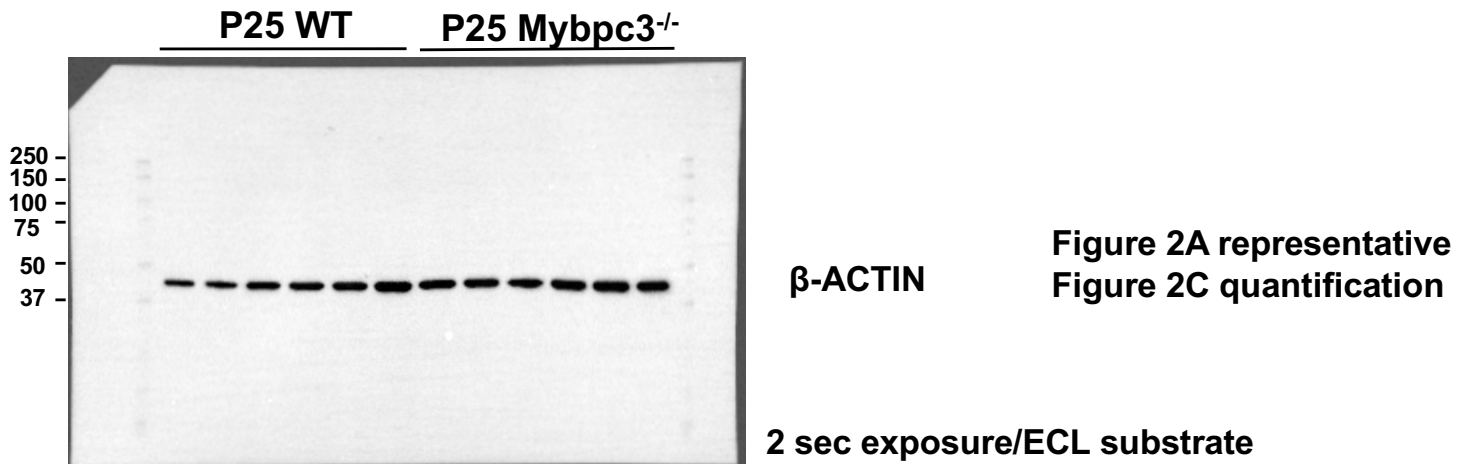

Figure 2A representative  
Figure 2C quantification

Full unedited gel for Figure 2B and 2D

Figure 2B representative all blots  
Figure 2D quantification all blots

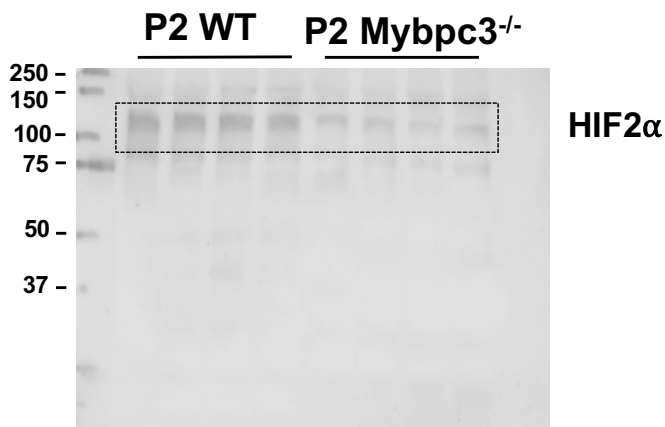

30 sec exposure/HS substrate

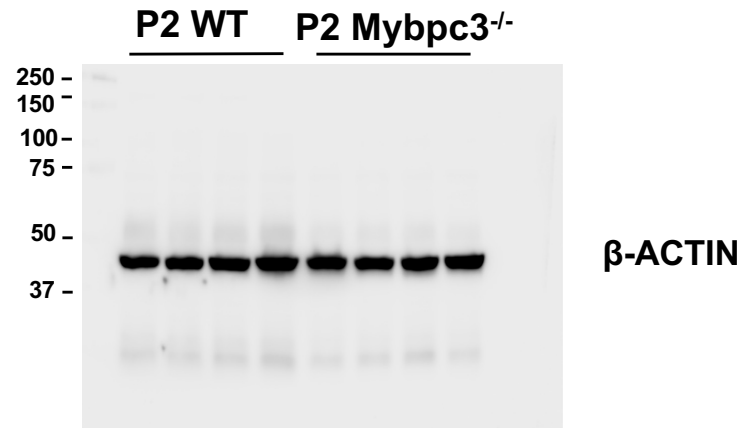

2 sec exposure/ECL substrate

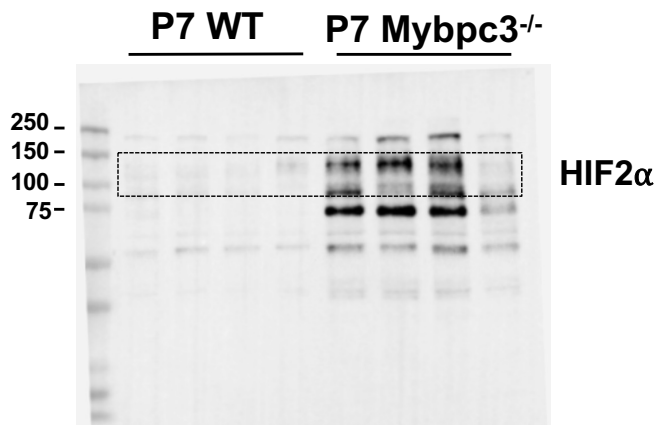

30 sec exposure/HS substrate

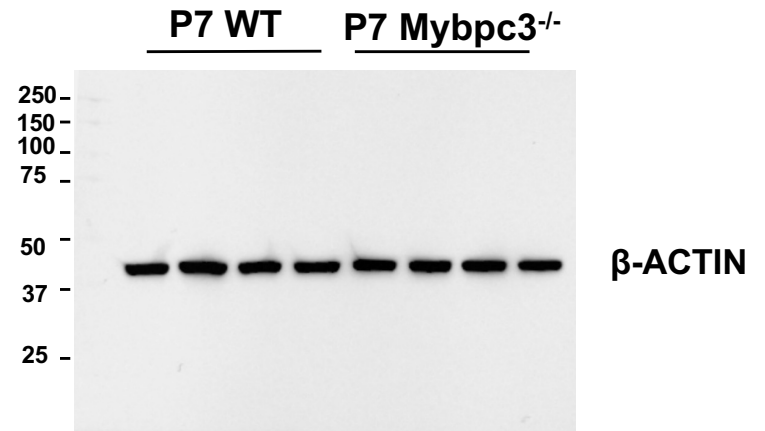

2 sec exposure/ECL substrate

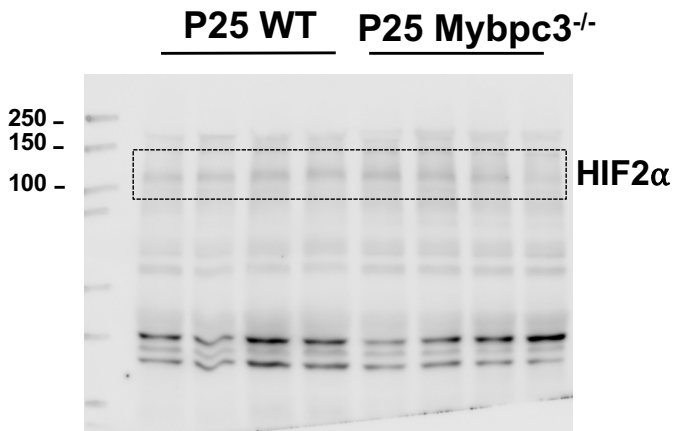

30 sec exposure/HS substrate

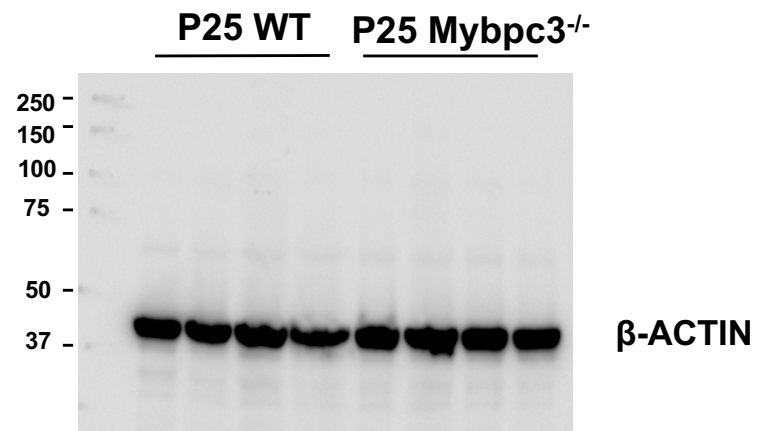

2 sec exposure/ECL substrate



# Full unedited gel for Figure 2D

# Figure 2D quantification only (all blots)

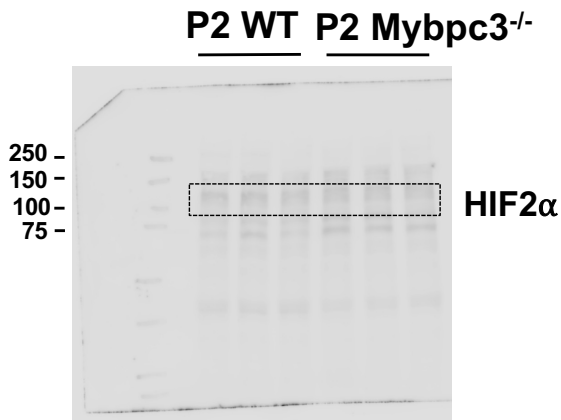

30 sec exposure/HS substrate

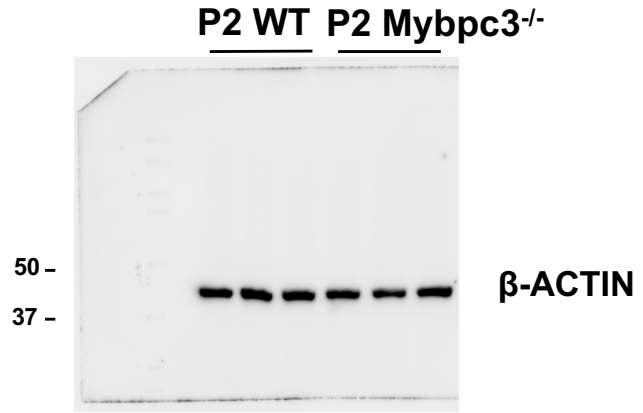

2 sec exposure/ECL substrate

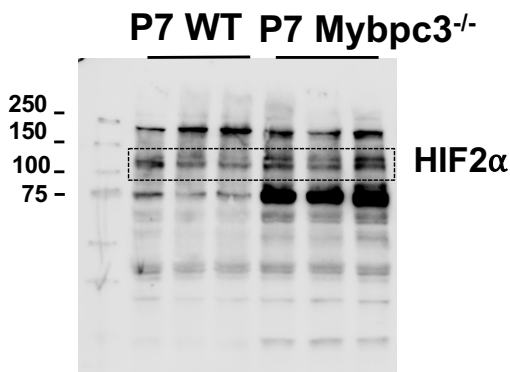

30 sec exposure/HS substrate

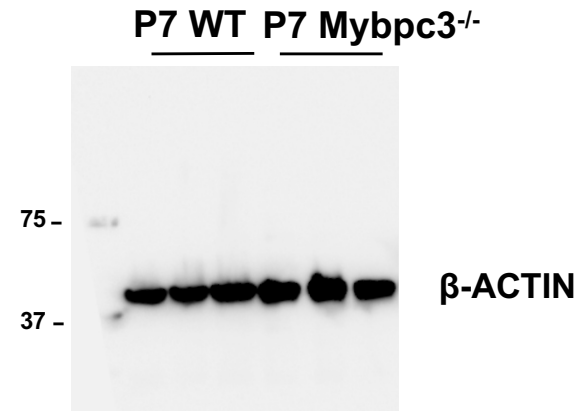

5 sec exposure/ECL substrate

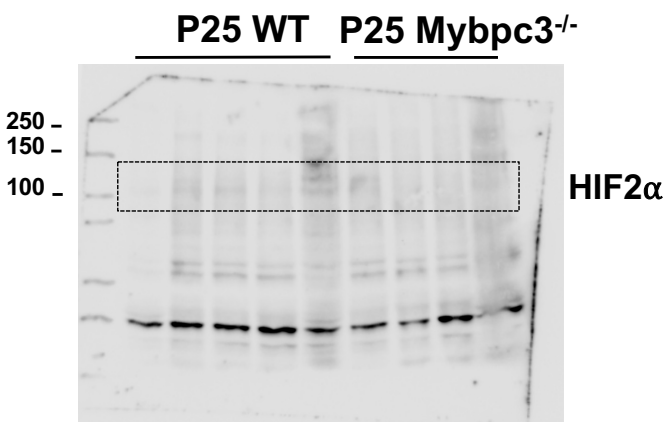

30 sec exposure/HS substrate

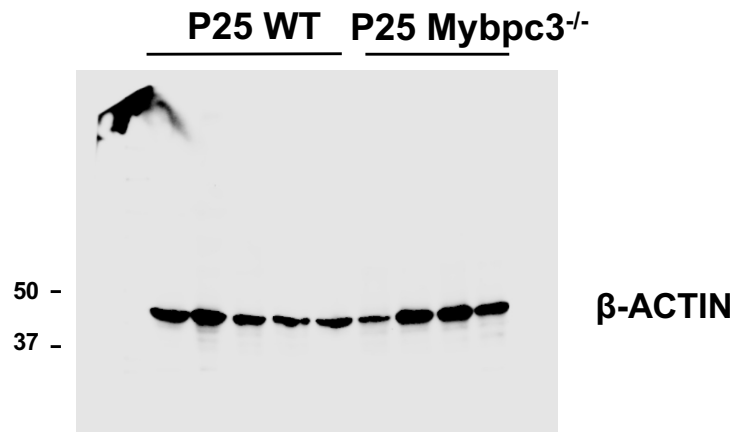

3 sec exposure/ECL substrate

# Full unedited gel for Figure 3B and 3C

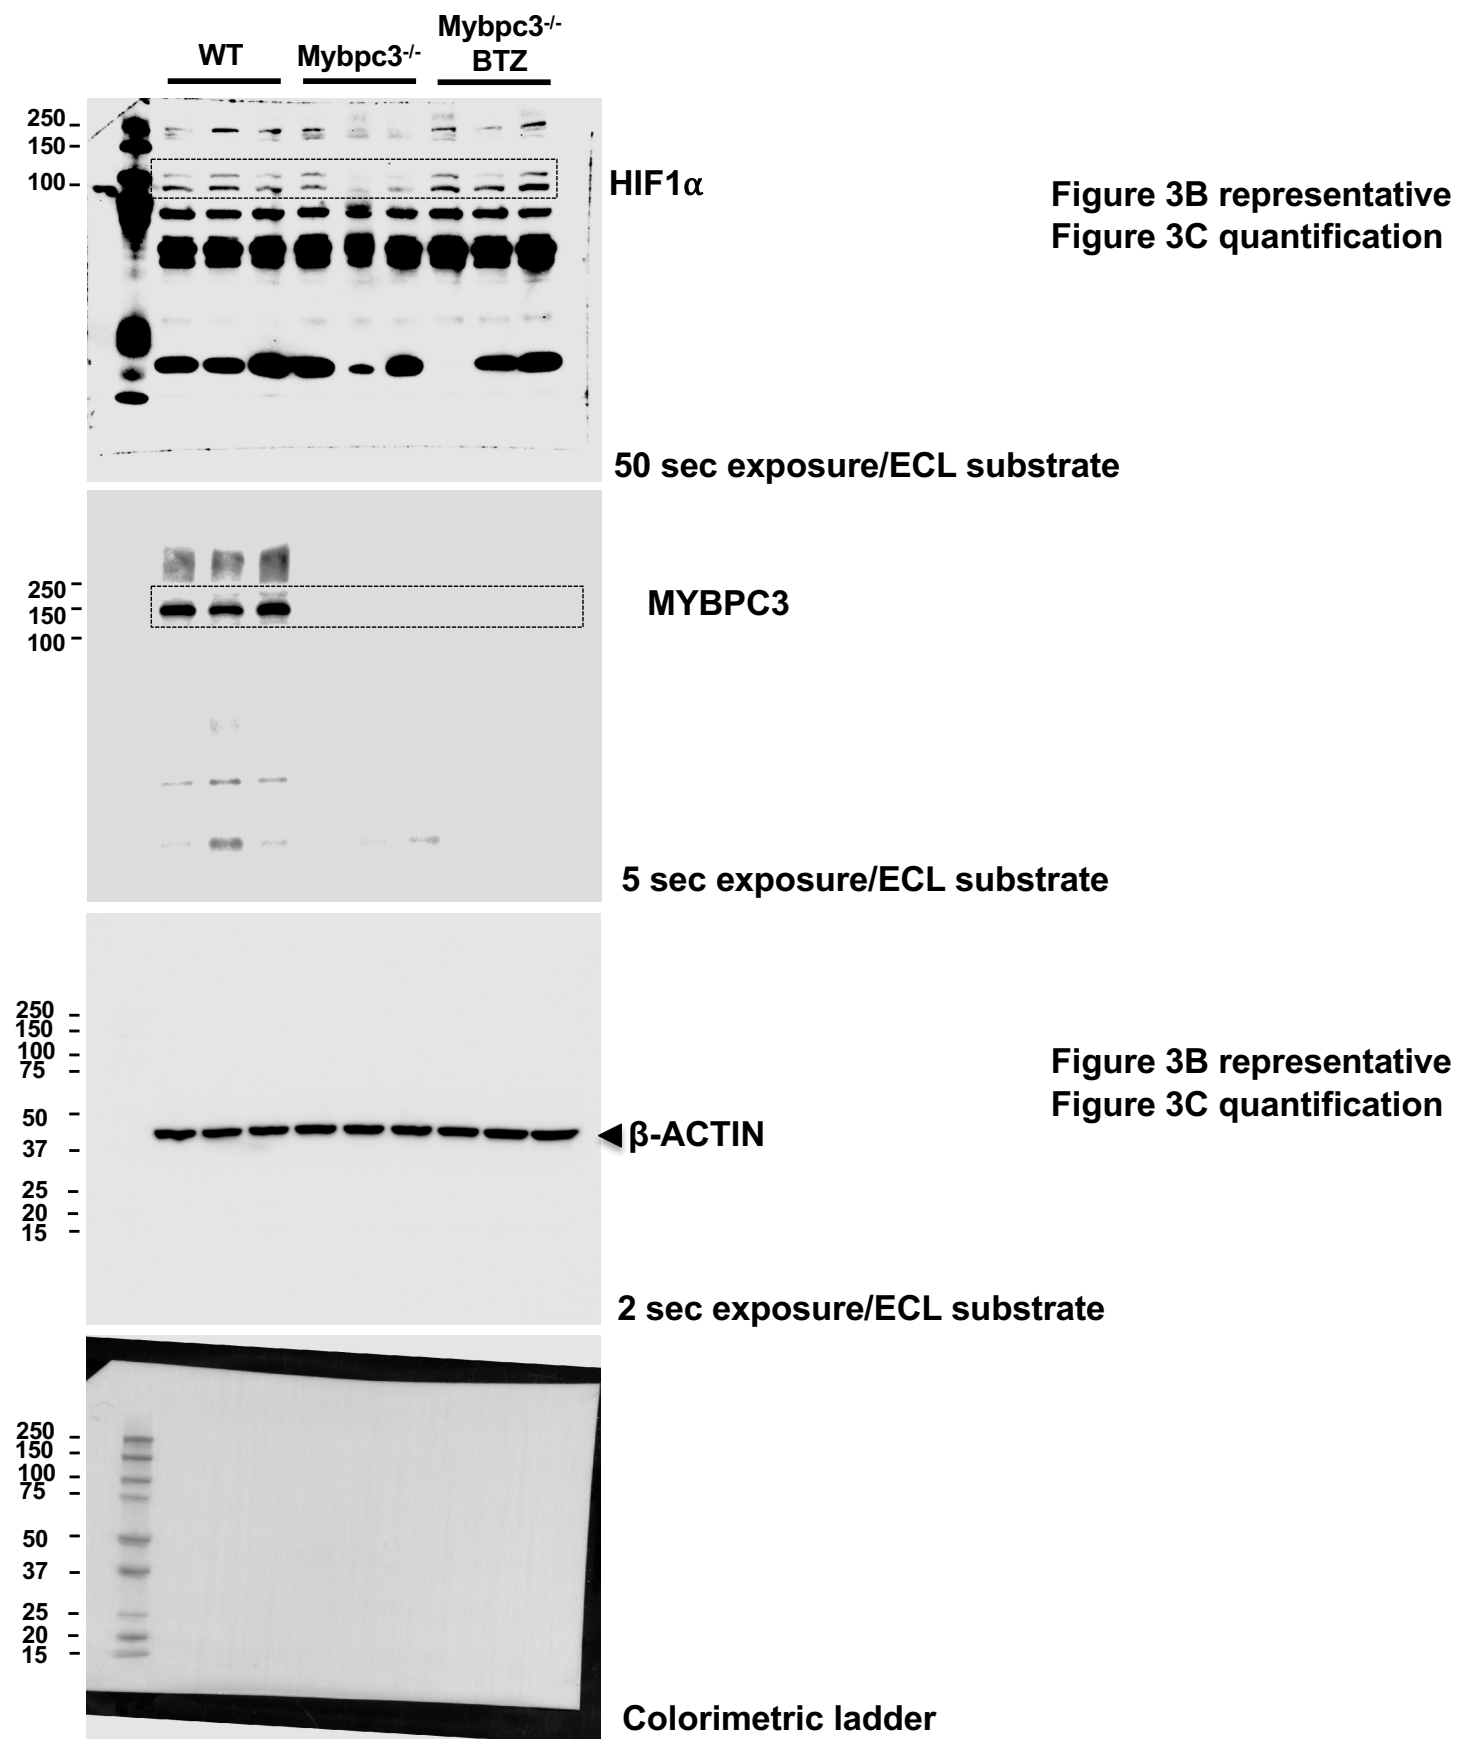

# Full unedited gel for Figure 3C

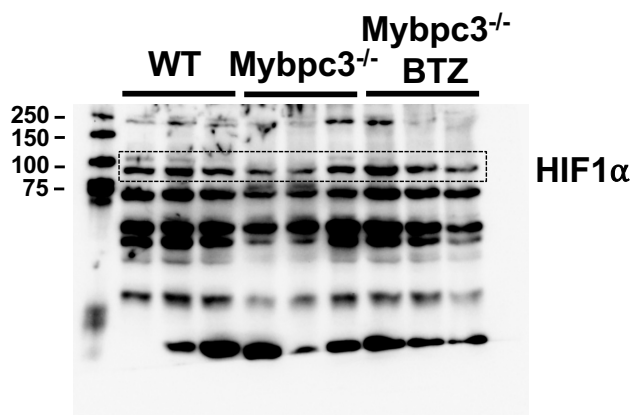

60 sec exposure/ECL substrate

Figure 3C quantification

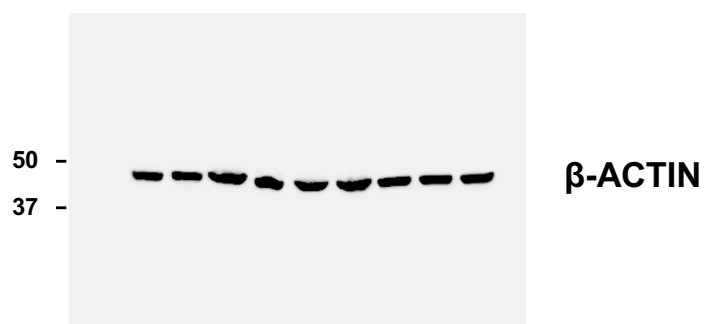

Figure 3C quantification

3 sec exposure/ECL substrate

# Full unedited gel for Figure 3F and 3G

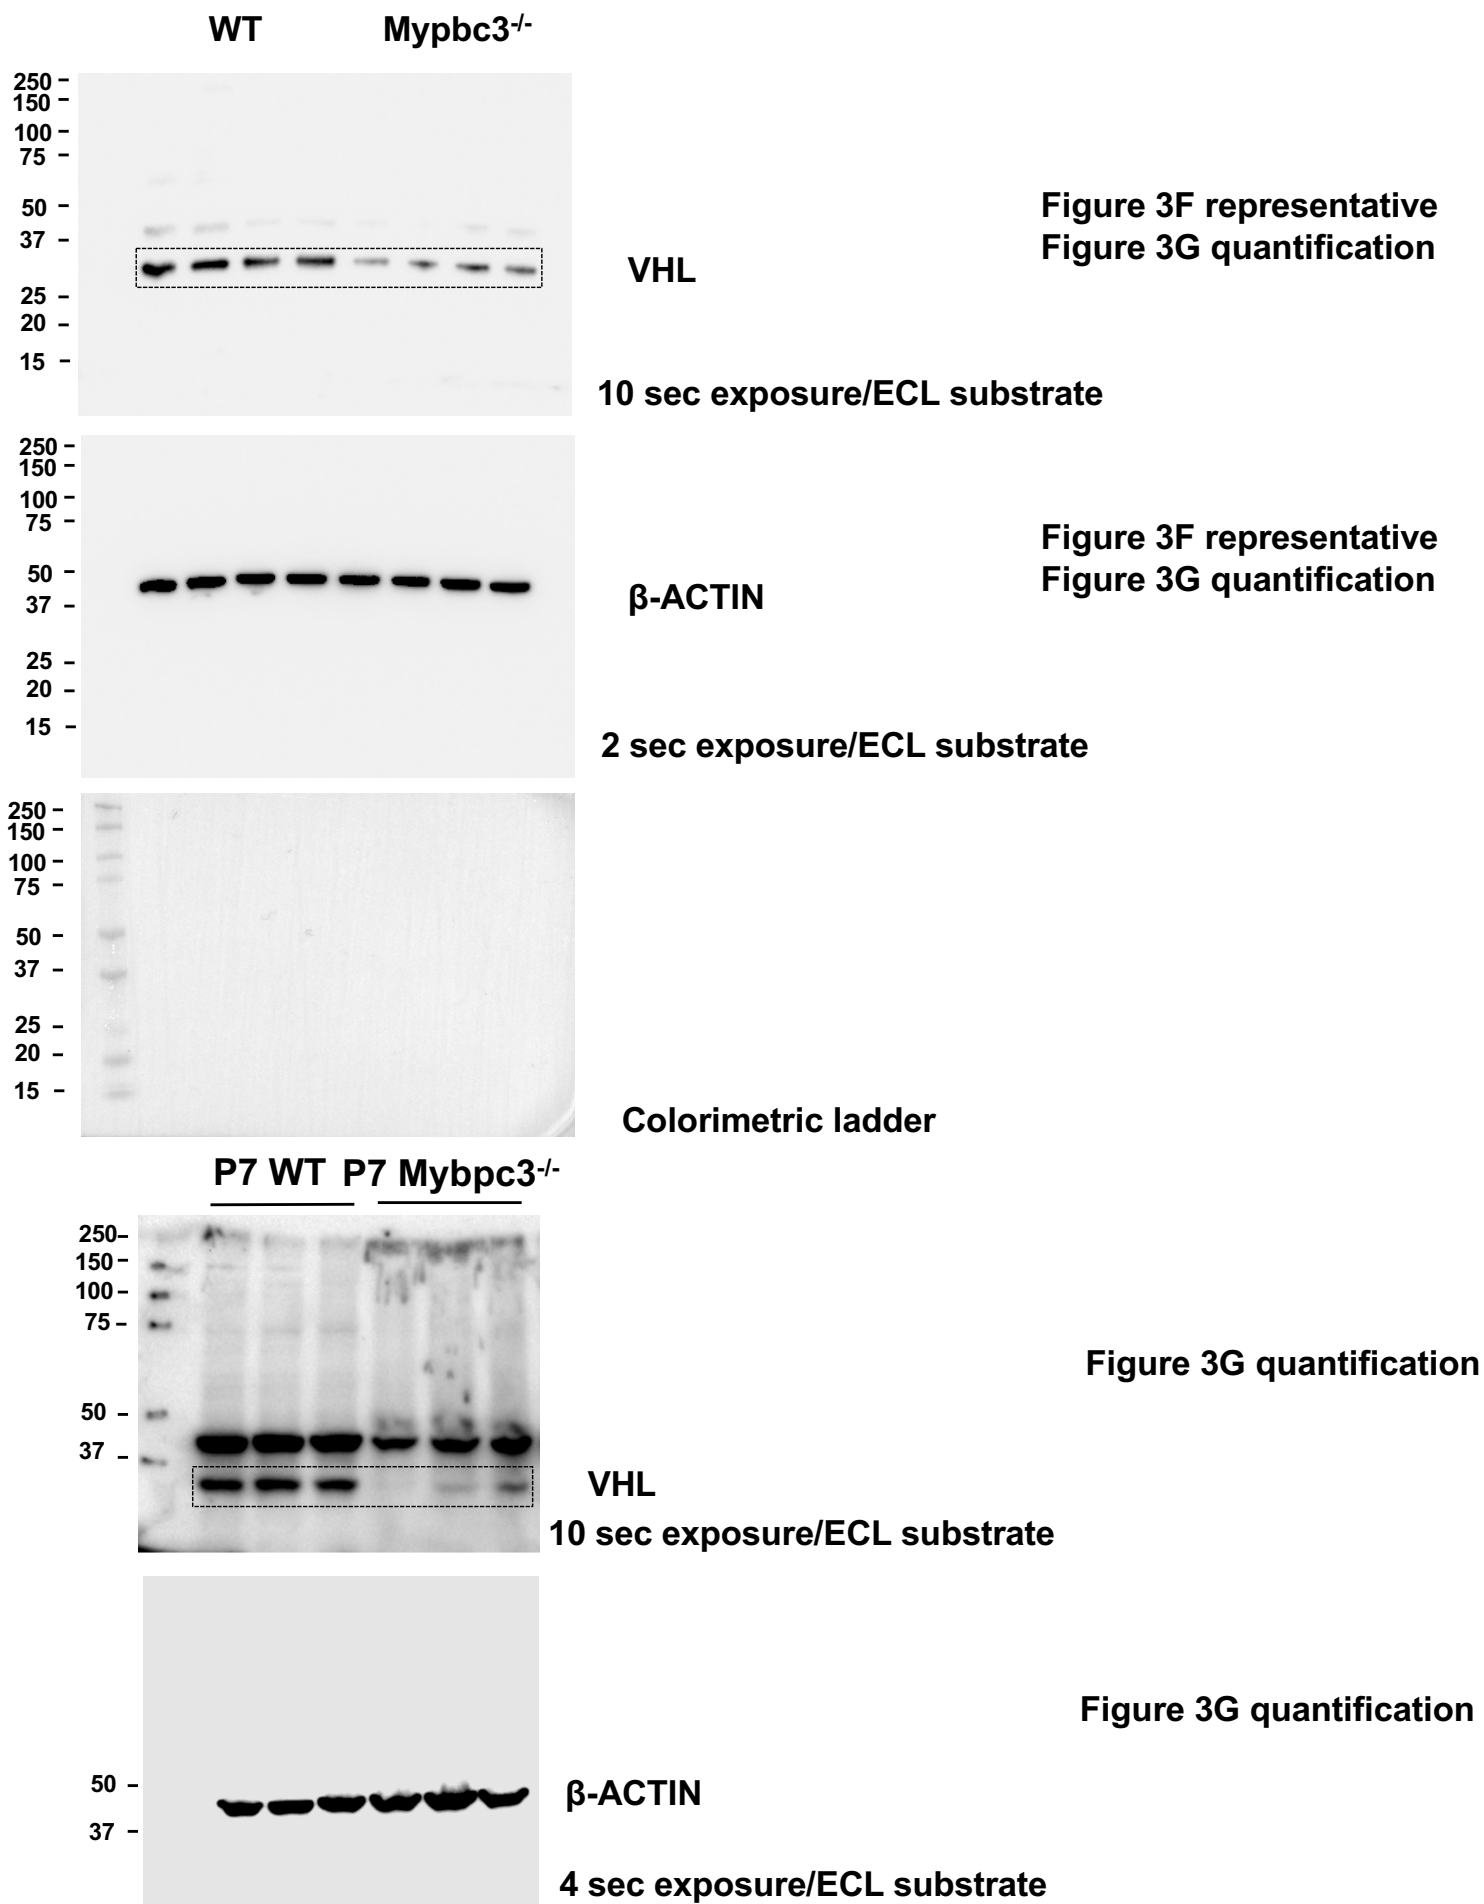

# Full unedited gel for Figure 3J and 3K

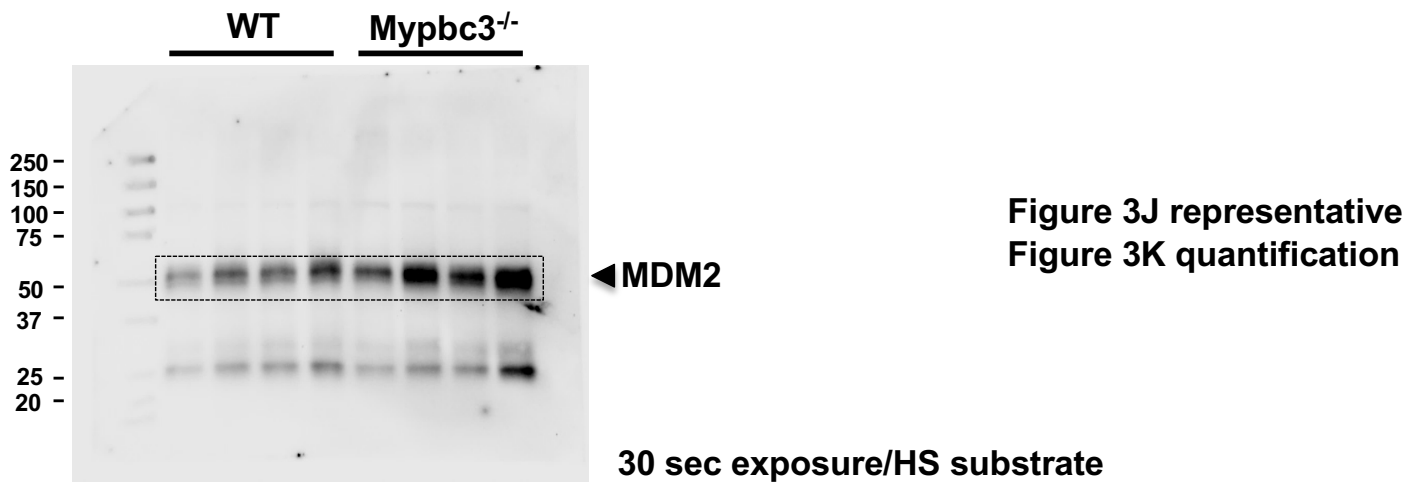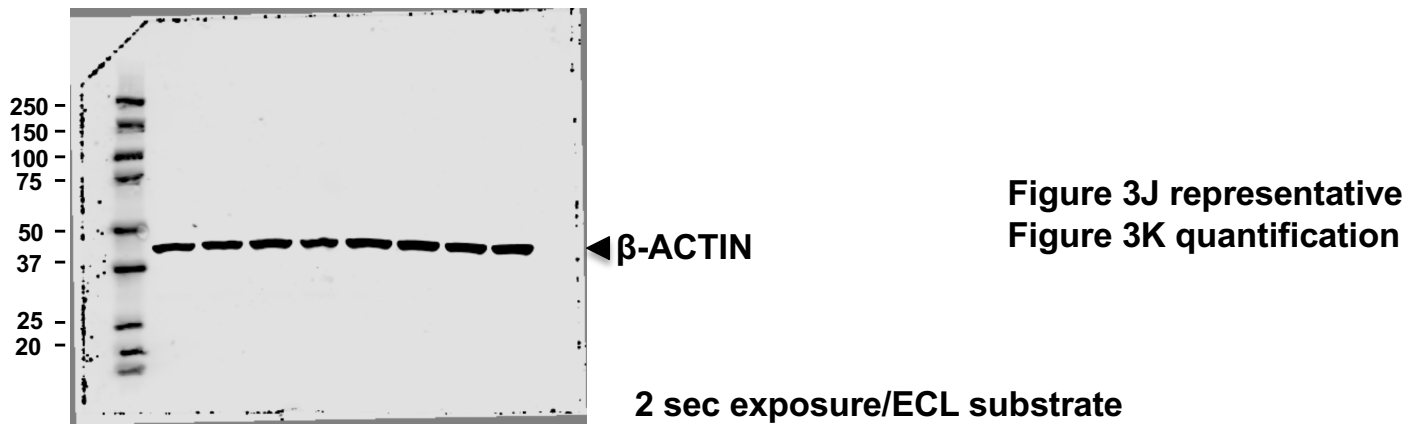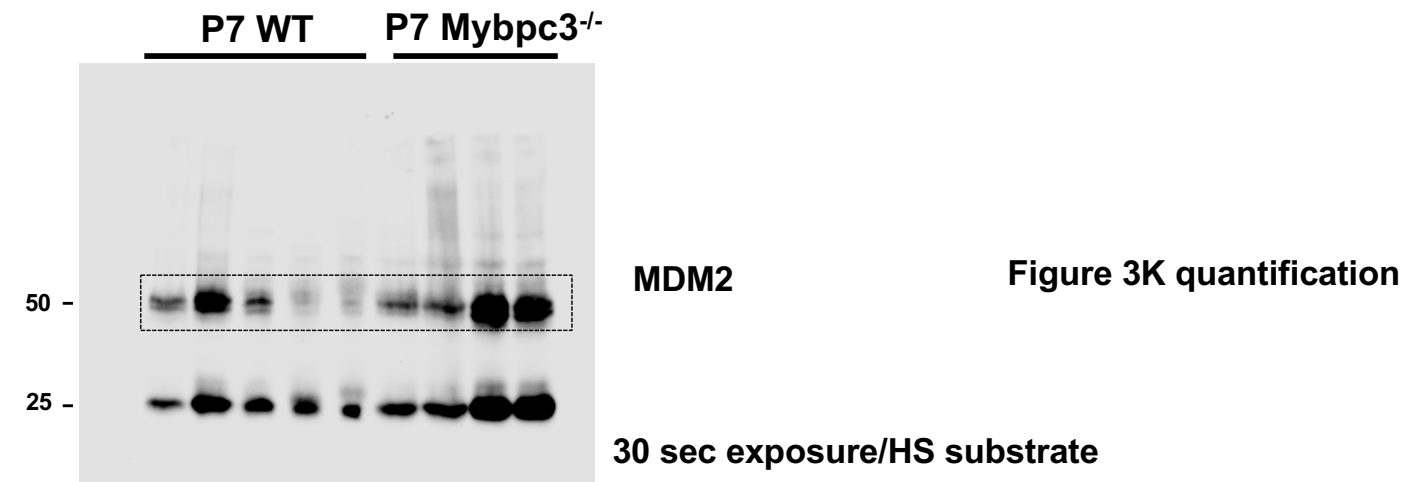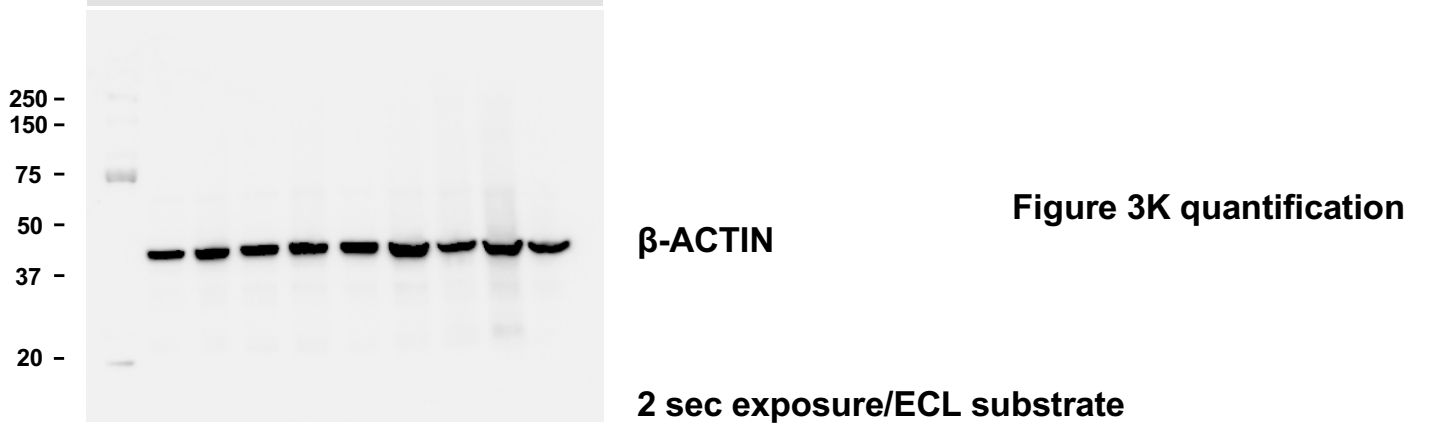

# Full unedited gel for Figure 3M

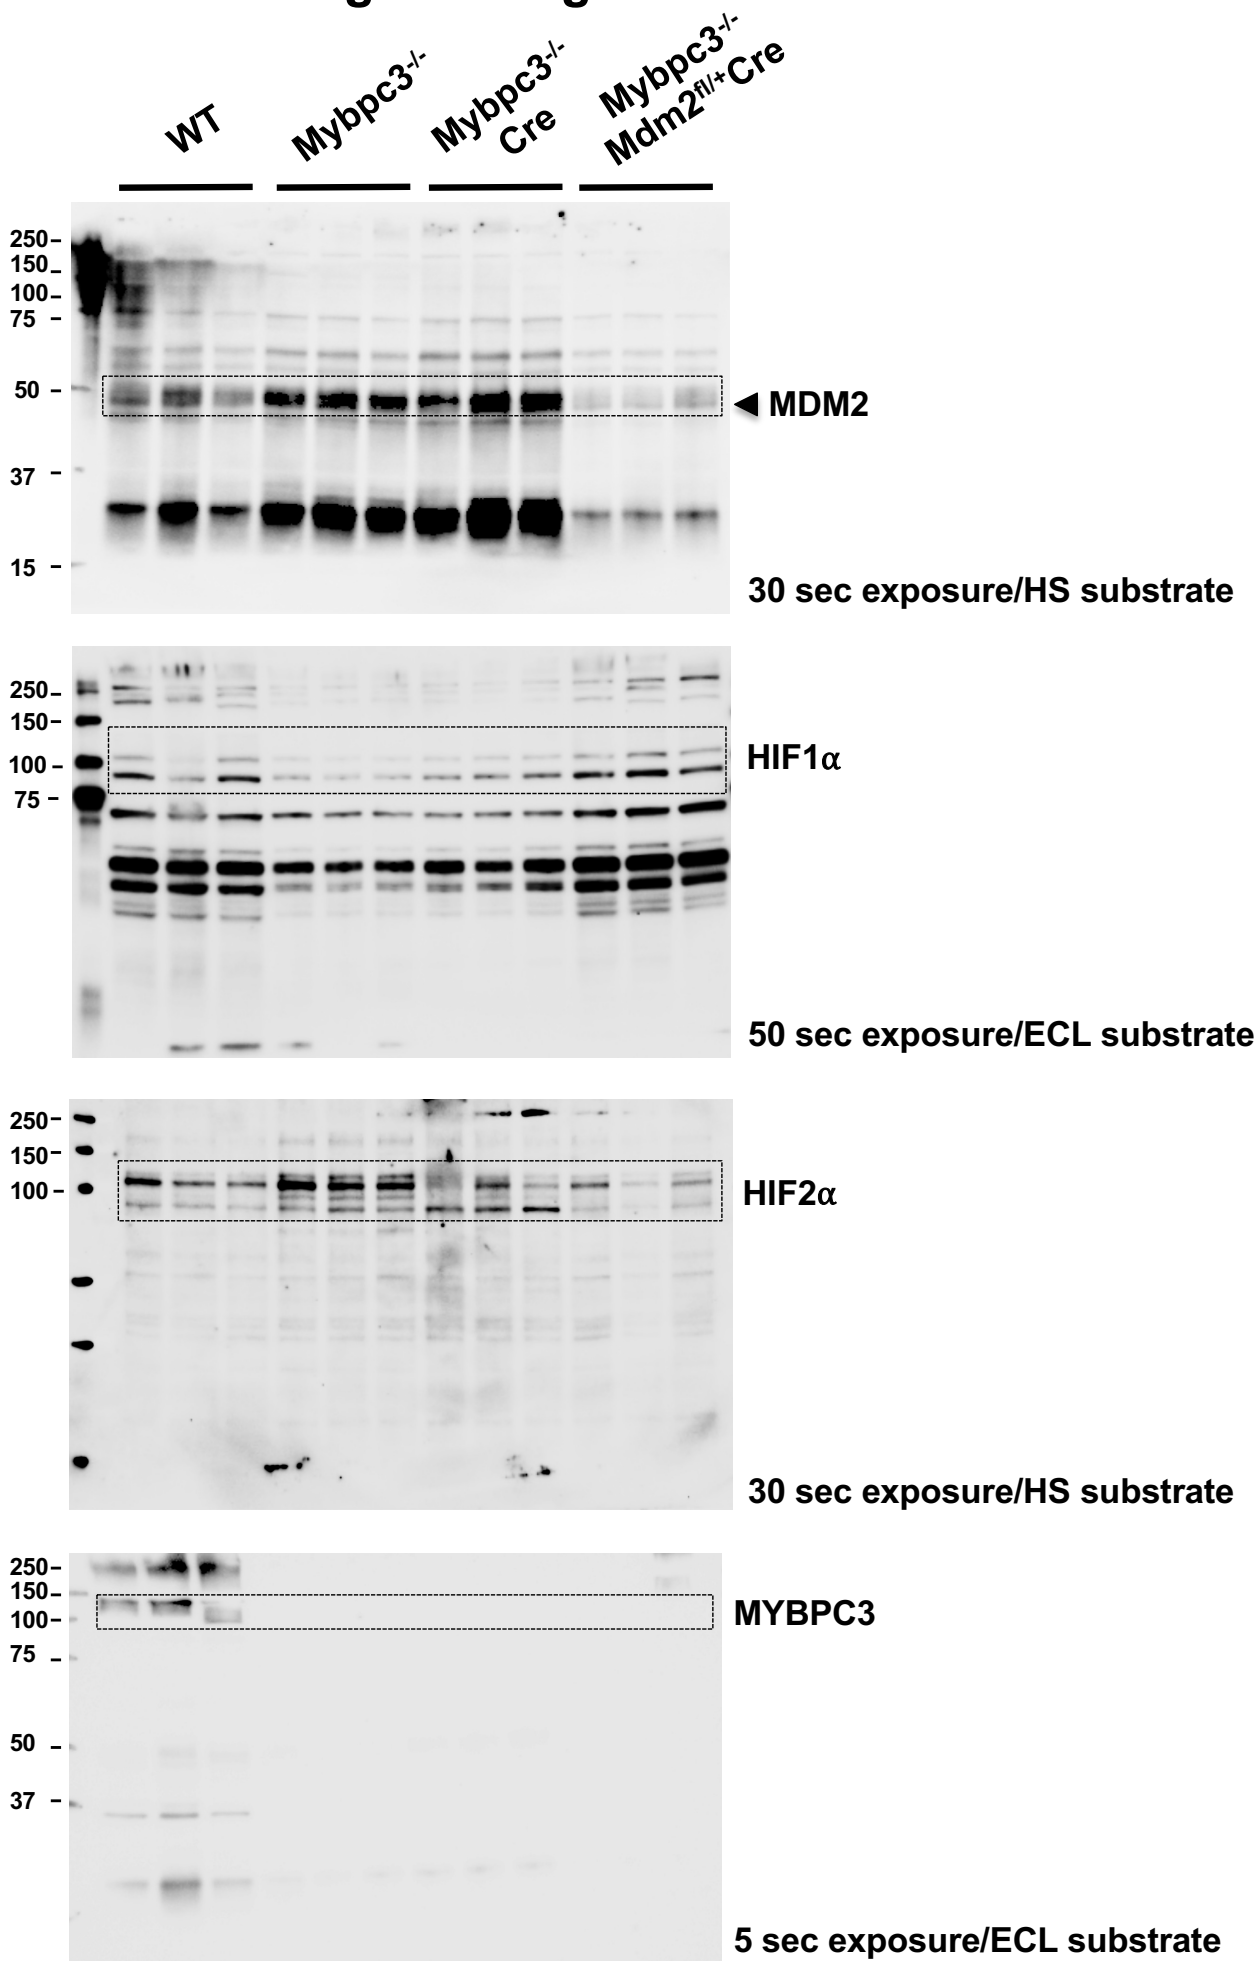

# Full unedited gel for Figure 3M

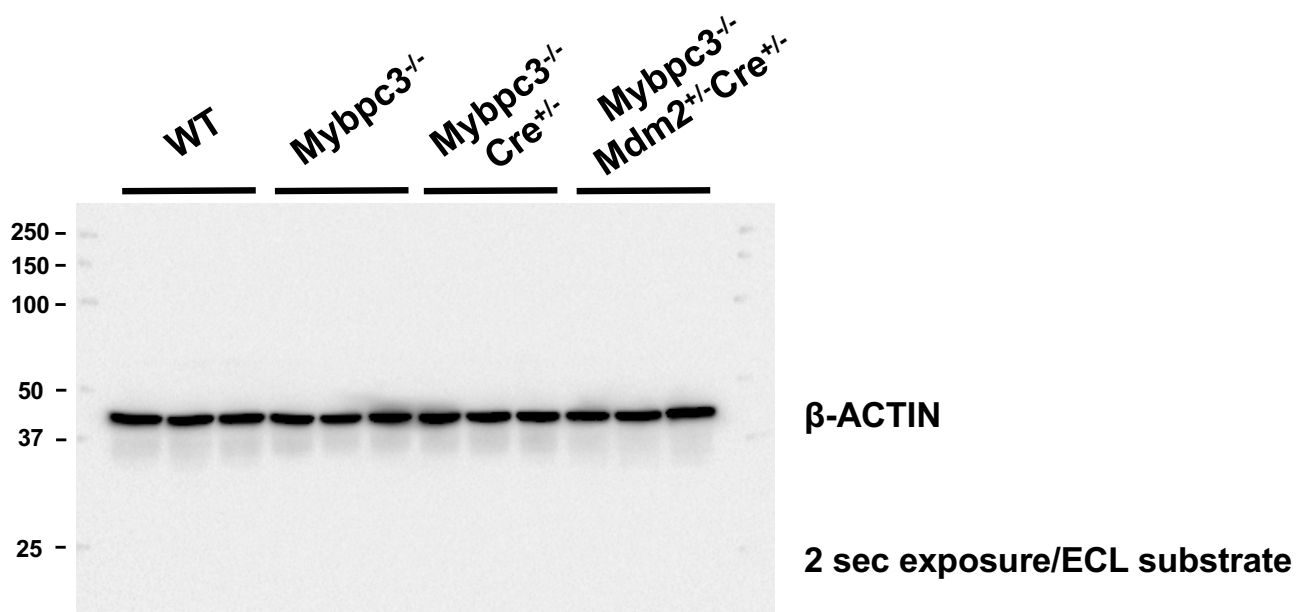

# Full unedited gel for Figure 3R

IP: HIF1 $\alpha$ :

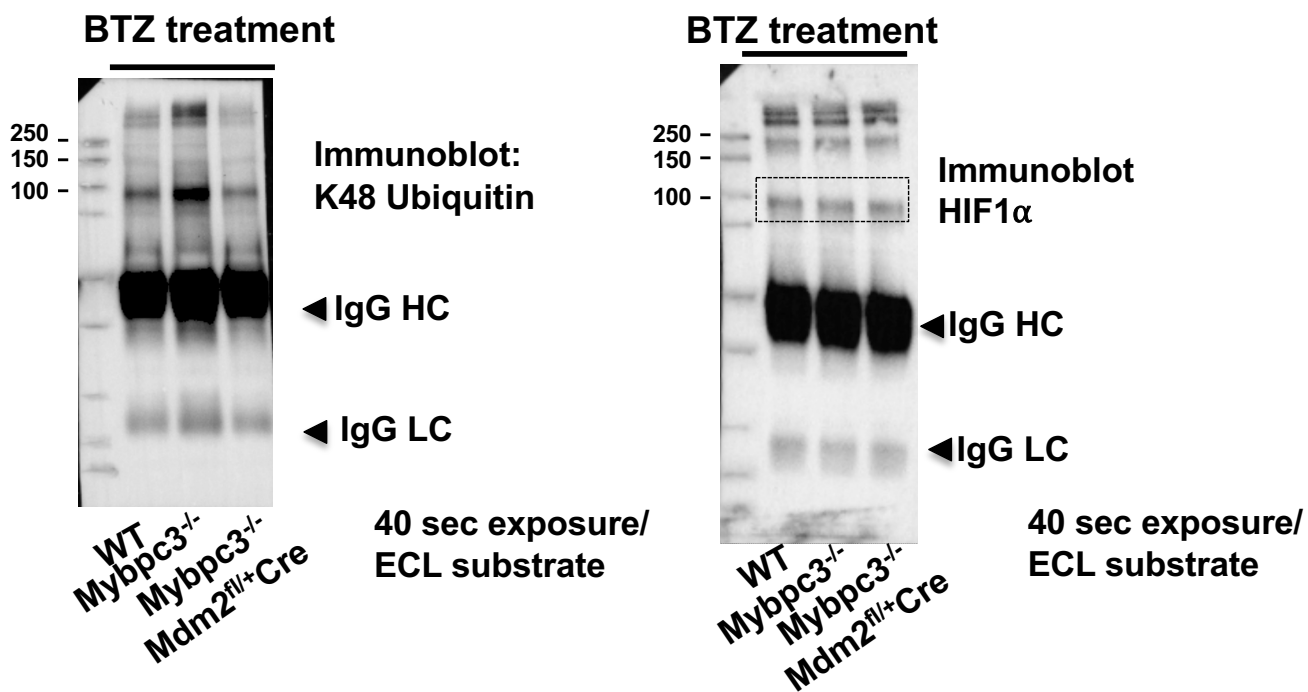

Input:

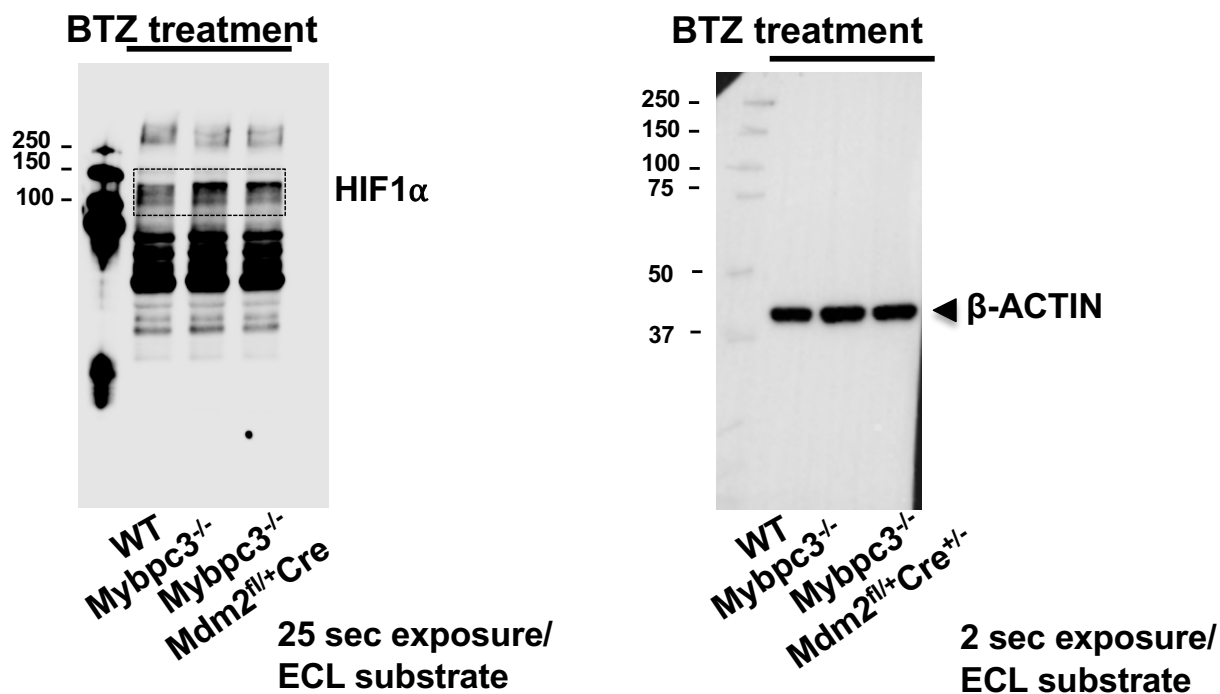



# Full unedited gel for Figure 4B and 4C

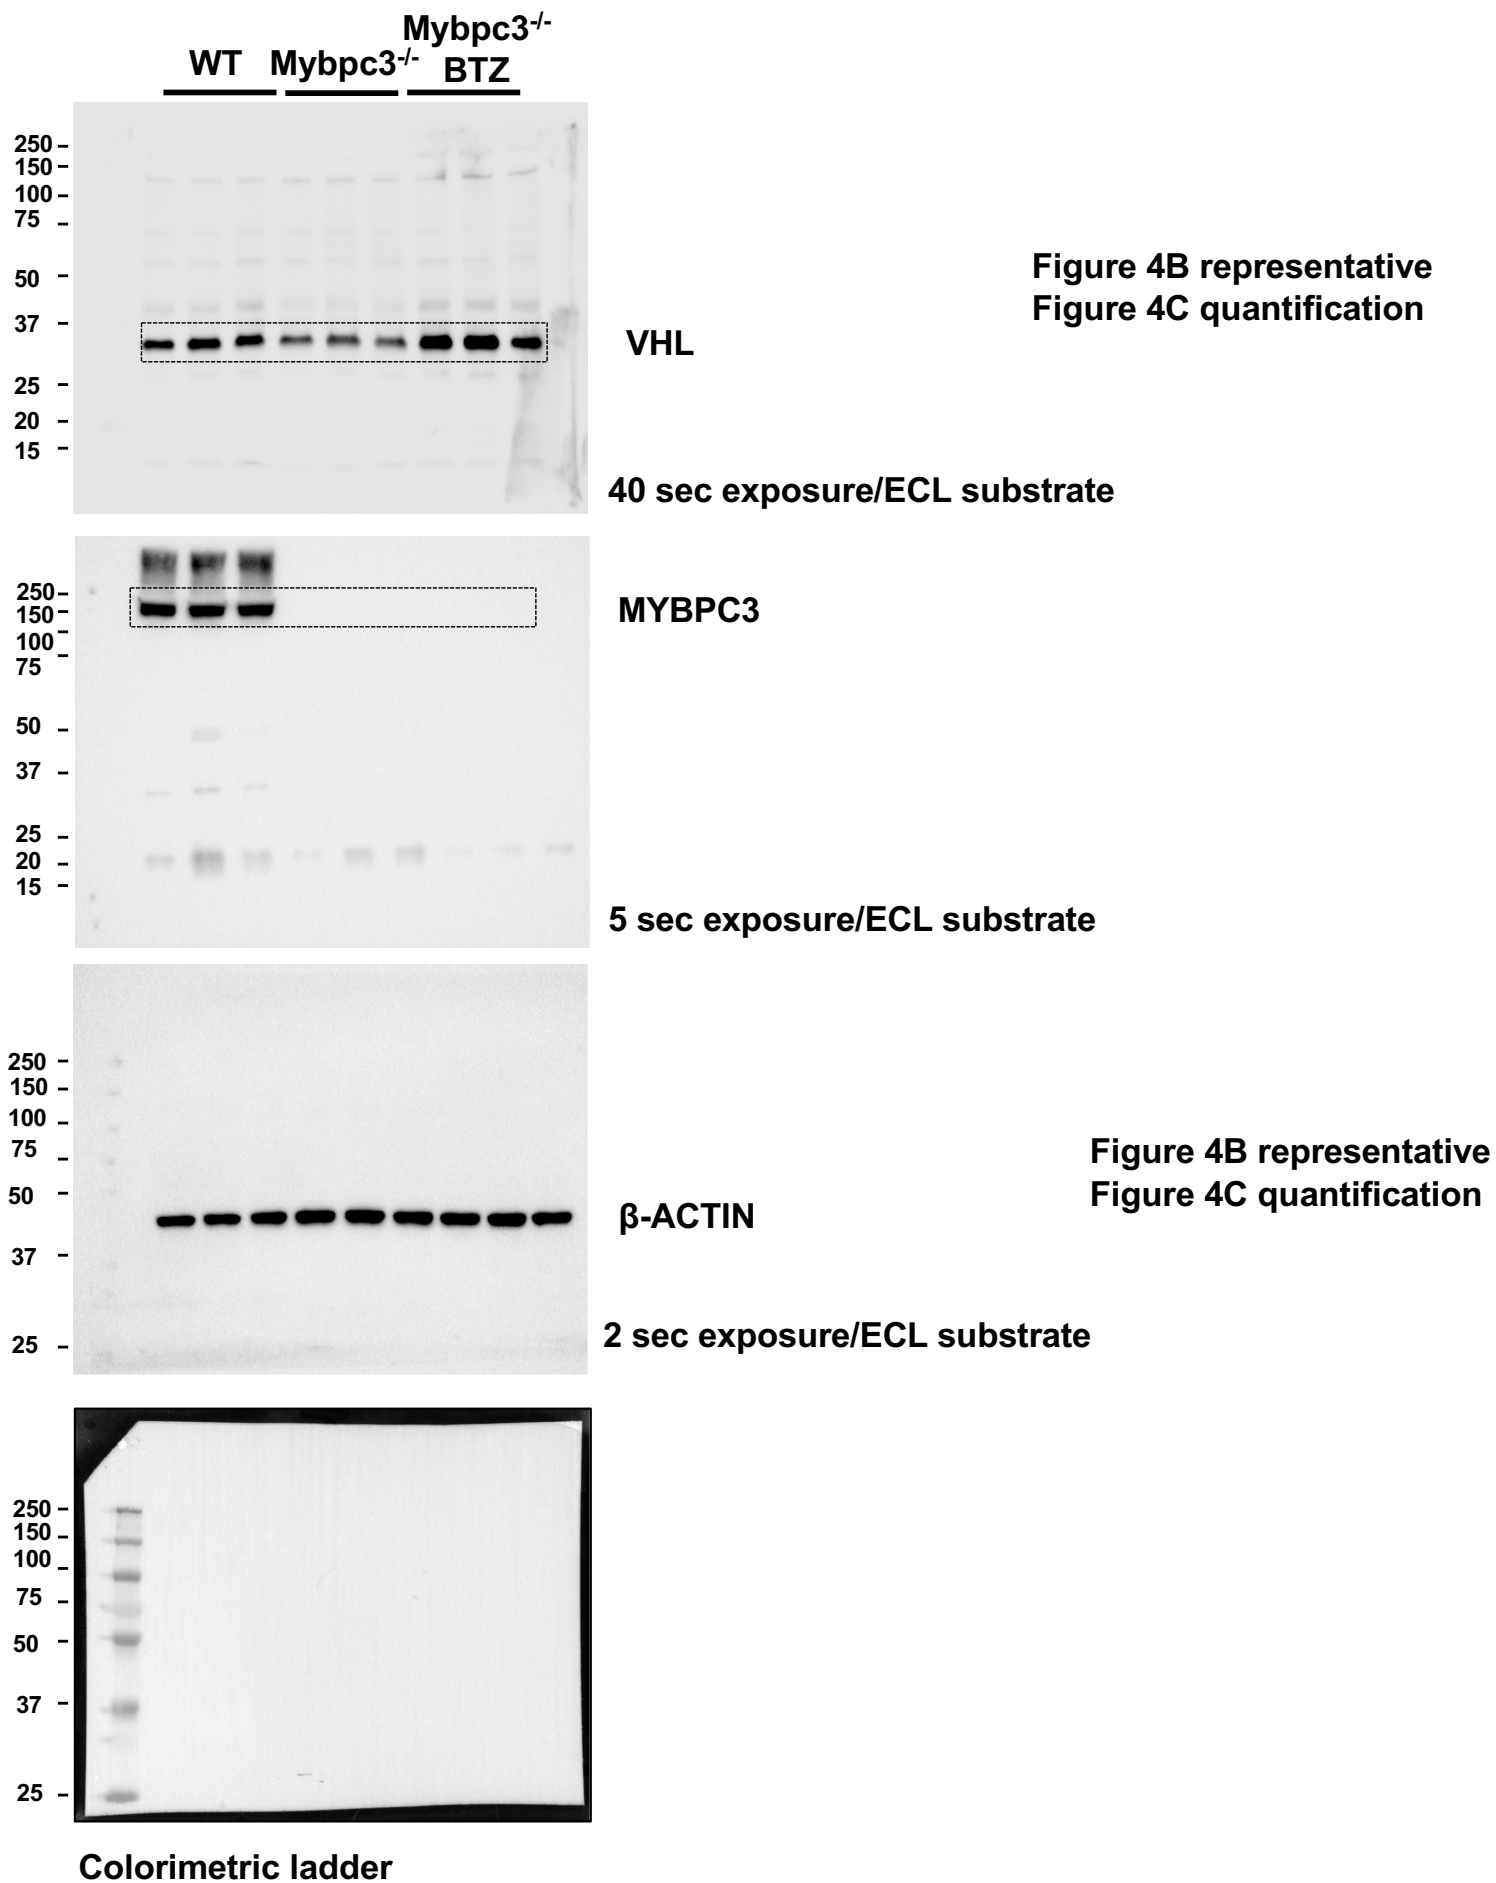

# Full unedited gel for Figure 4C

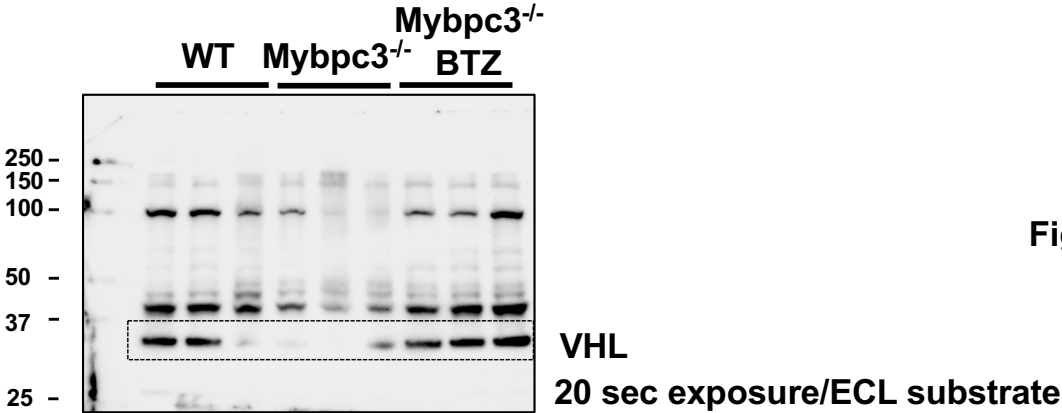

Figure 4C quantification

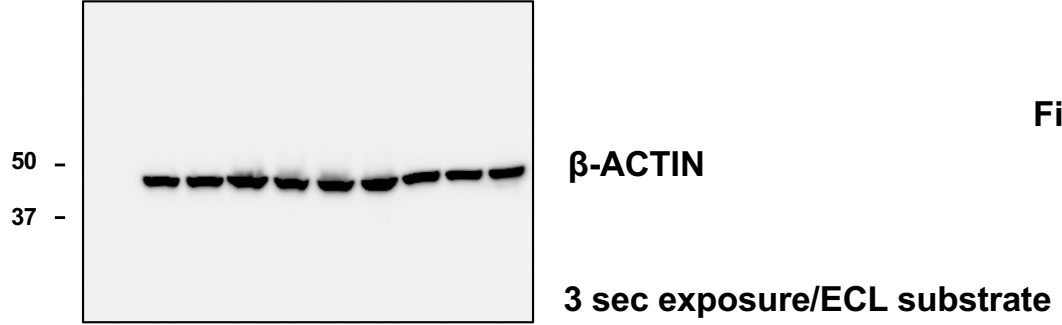

Figure 4C quantification

# Full unedited gel for Figure 4D

Co-IP: MDM2

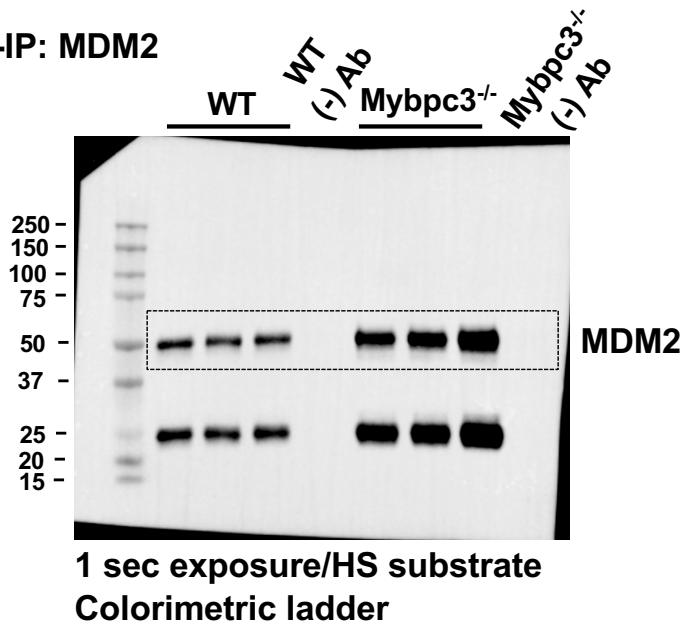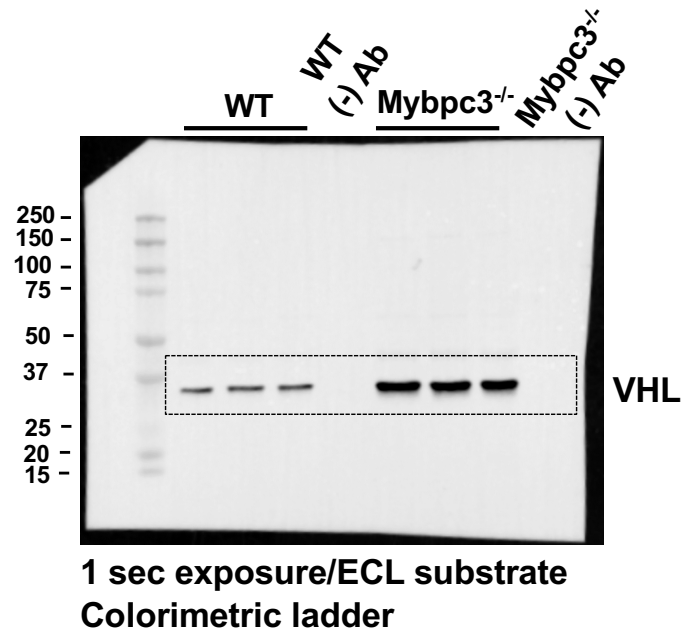

Input:

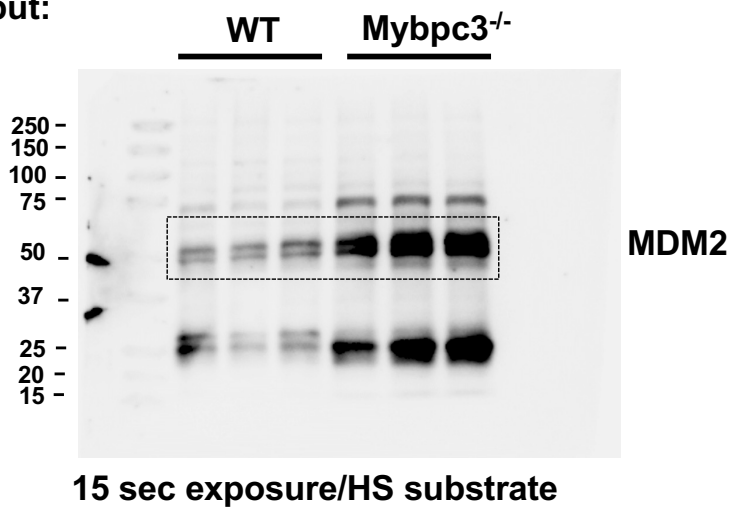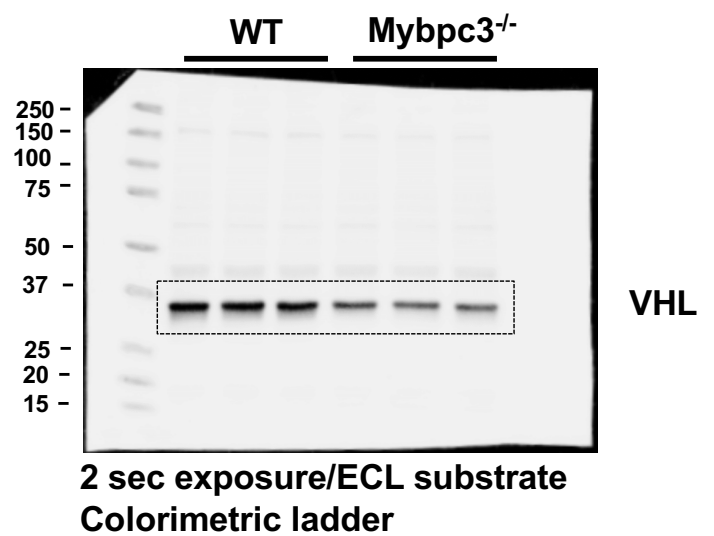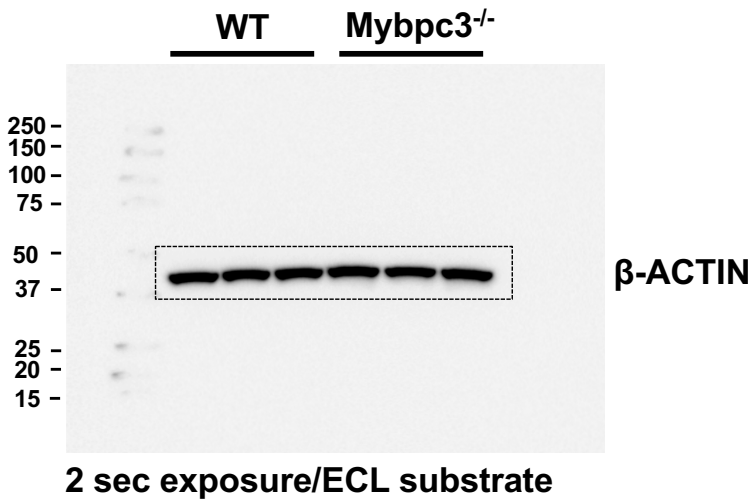

# Full unedited gel for Figure 4I

IP:VHL

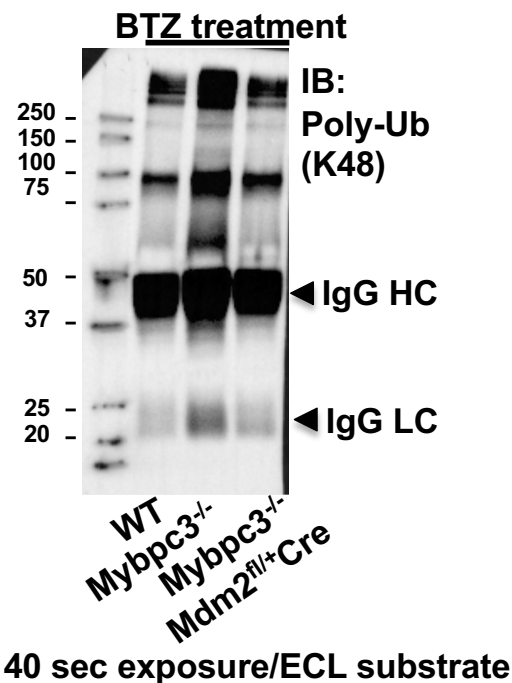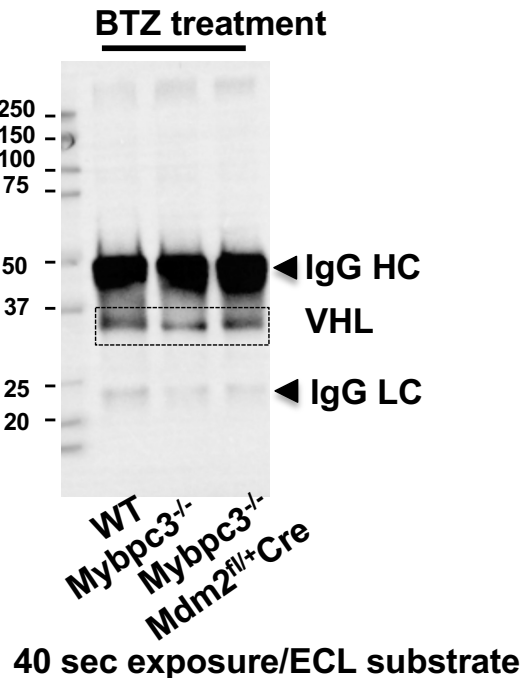

Input:

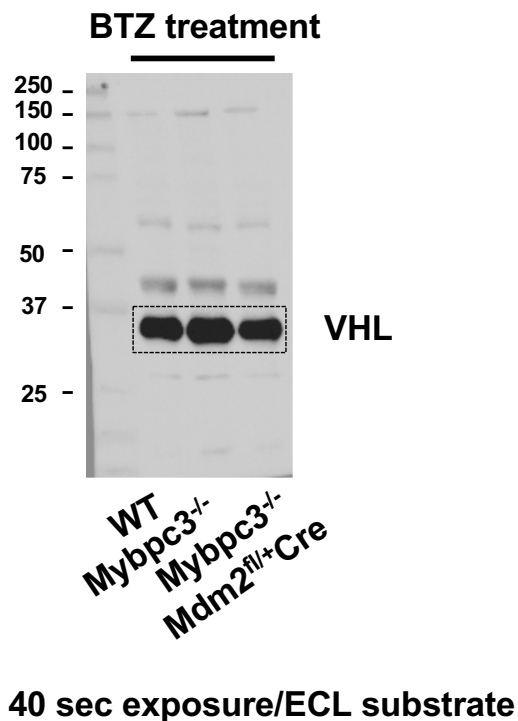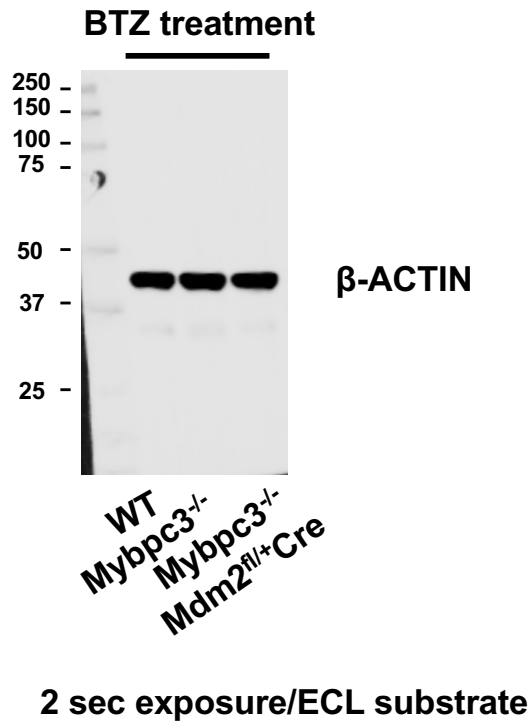

# Full unedited gel for Figure 4O

IP:HIF2 $\alpha$

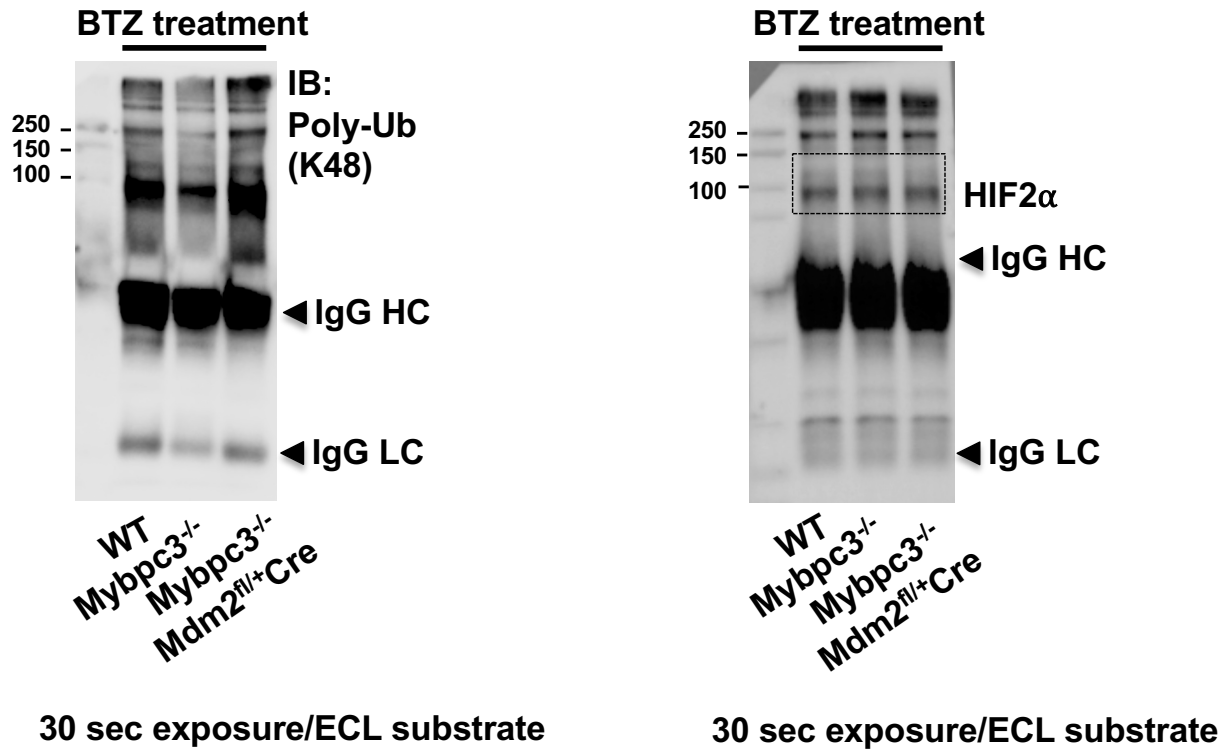

Input:

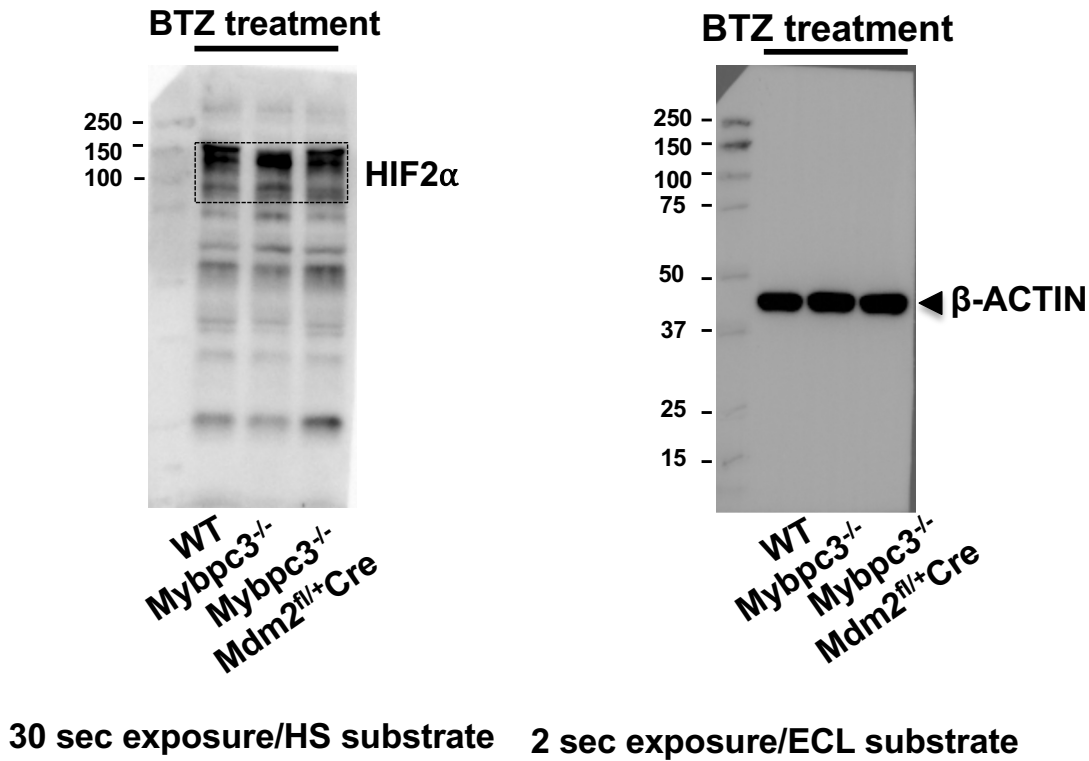

# Full unedited gel for Figure 6J to 6M

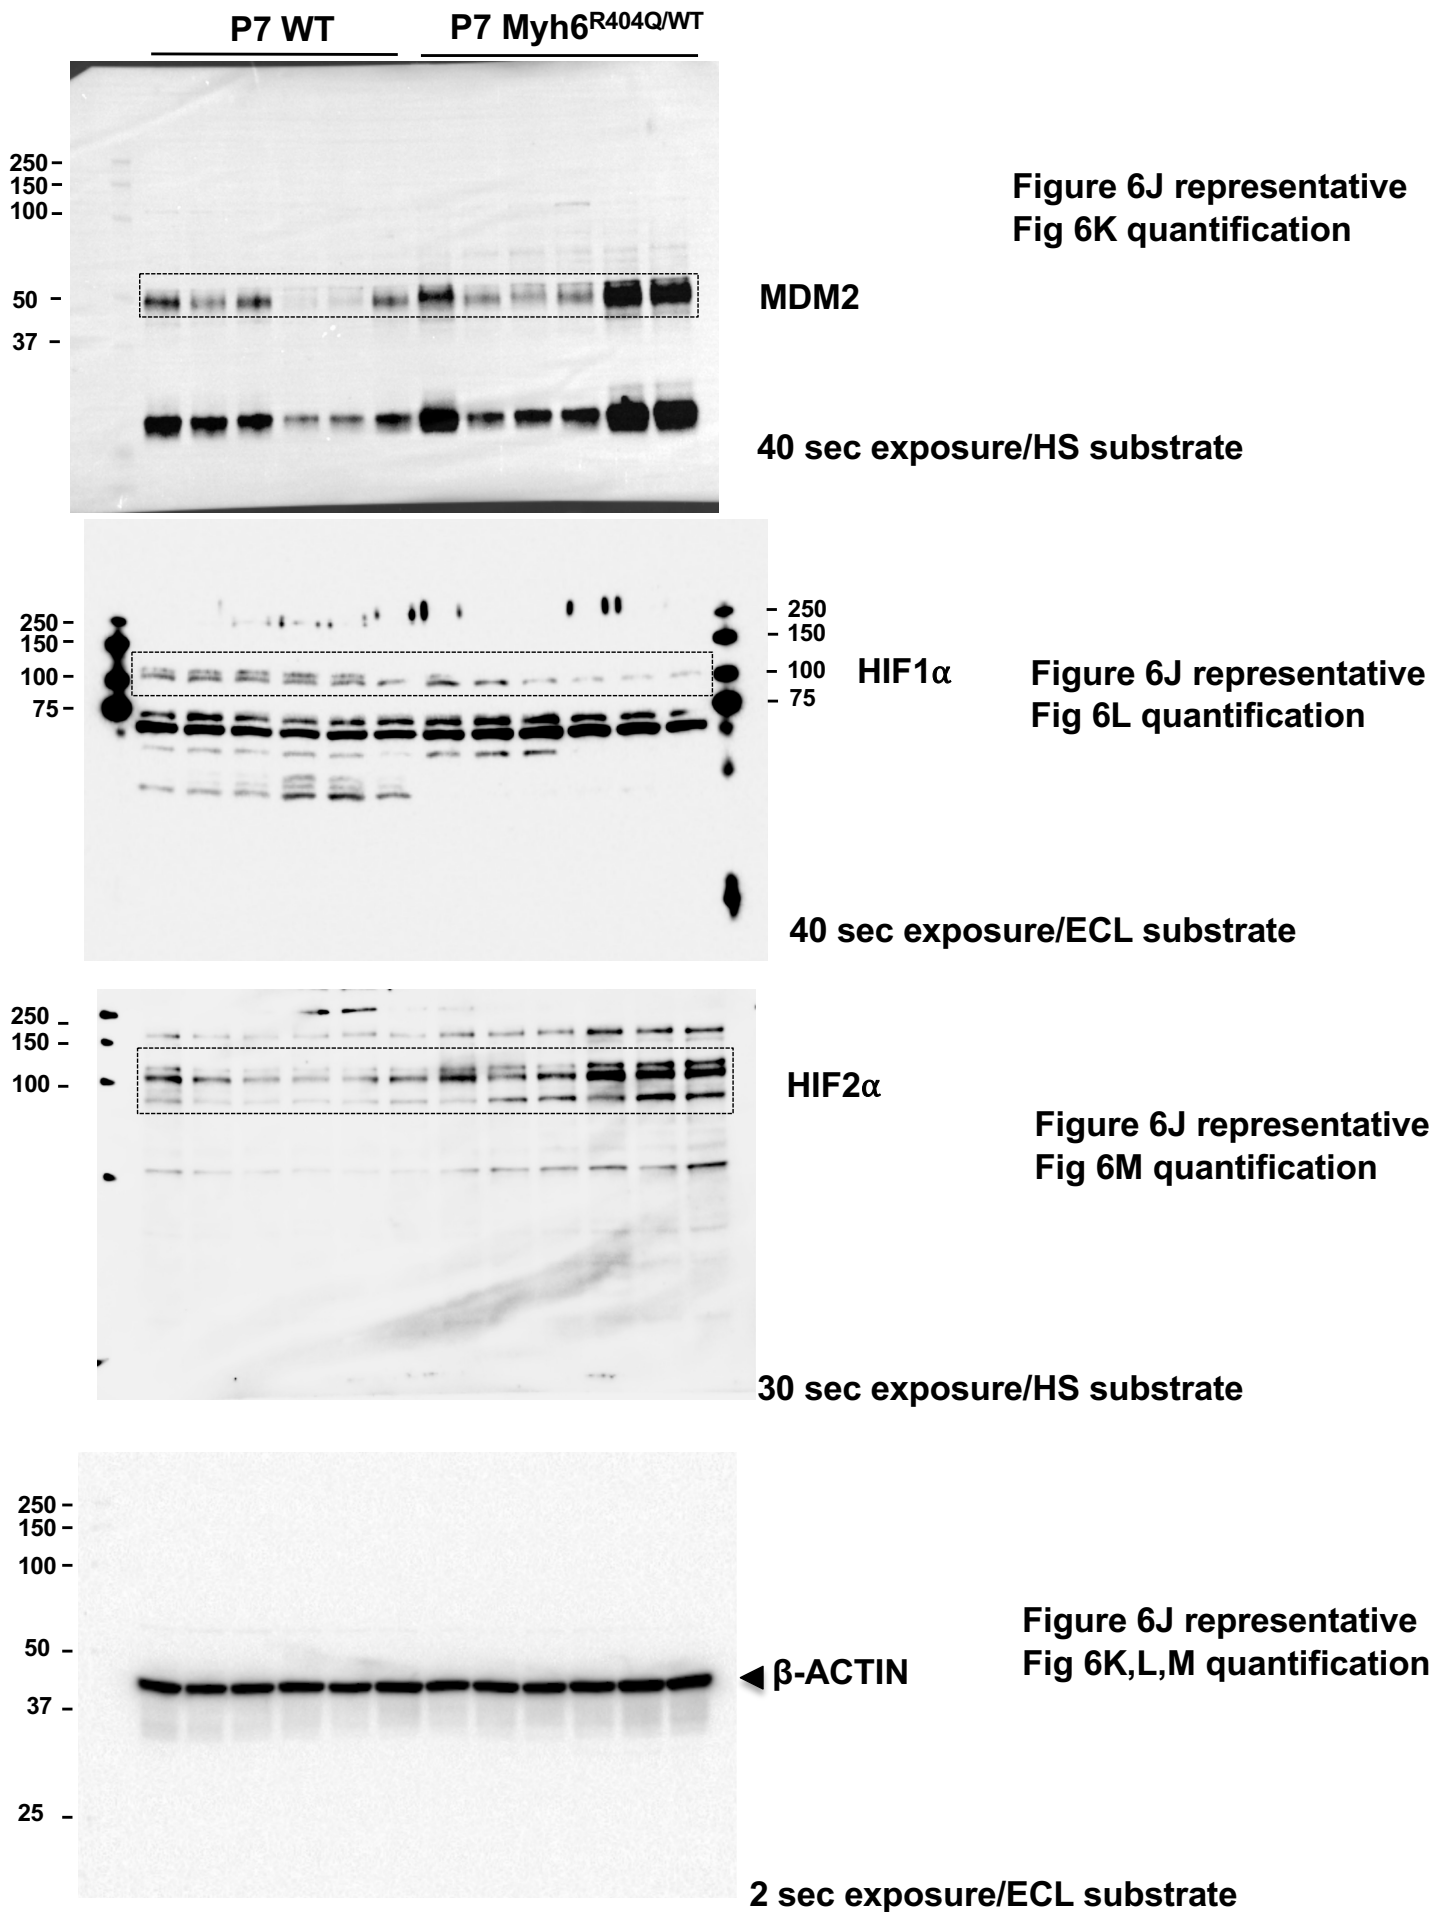

# Full unedited gel for Figure 6K

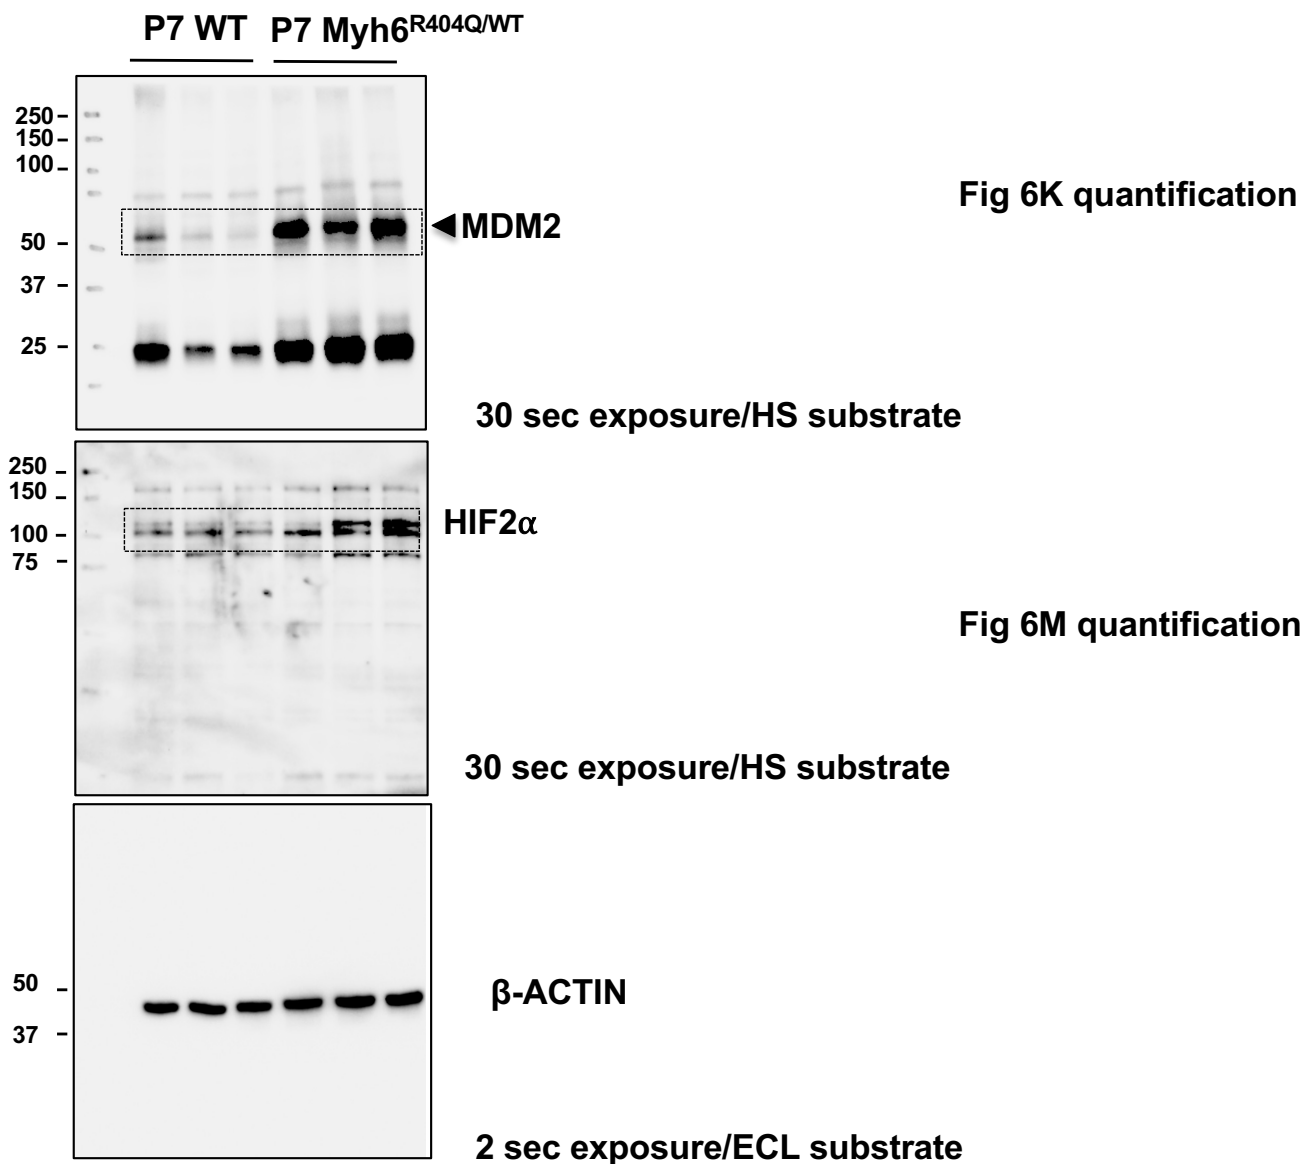

# Full unedited gel for Figure 7B

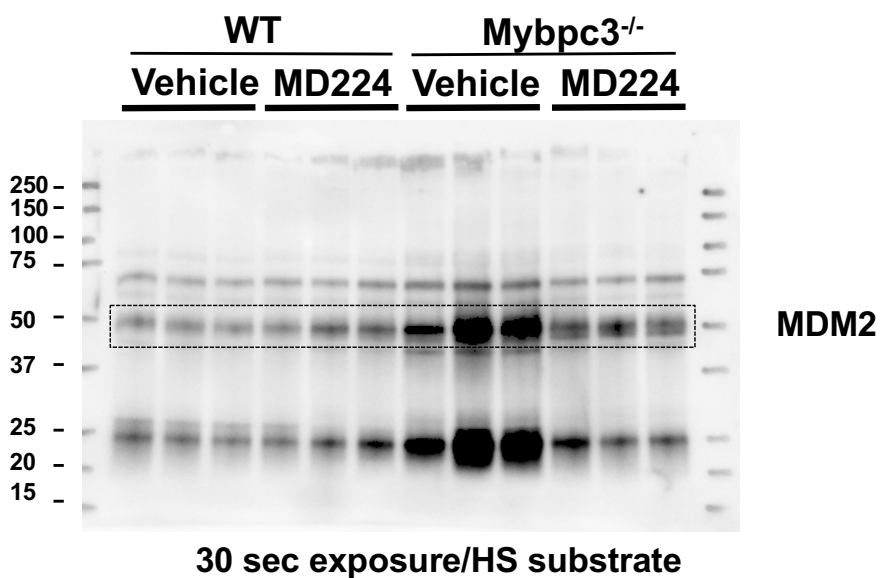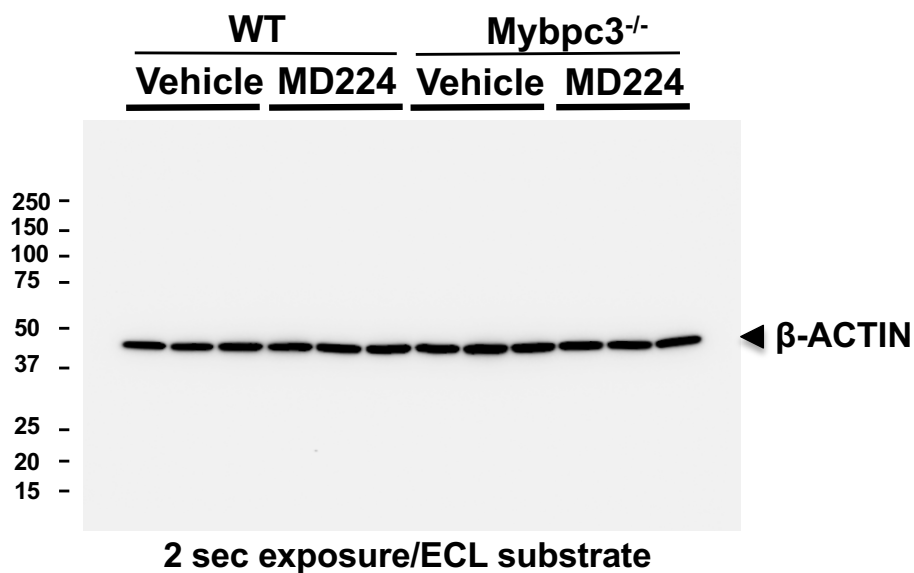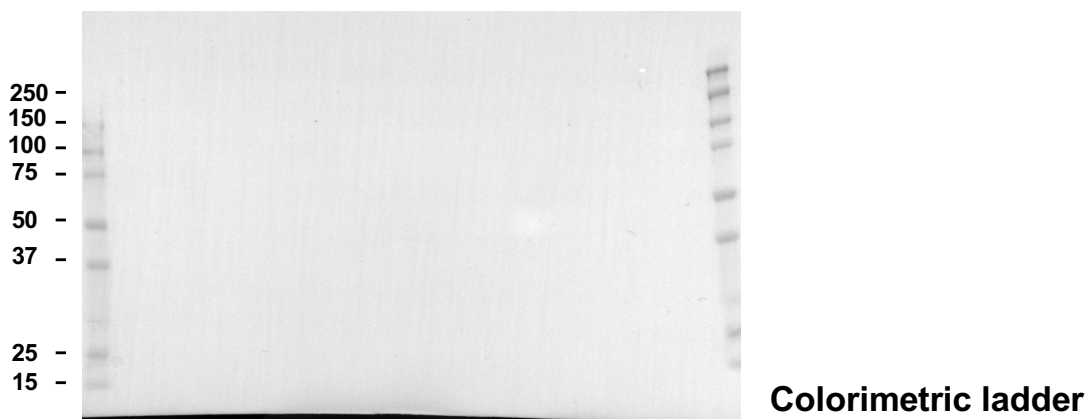



# Full unedited gel for Figure 7B

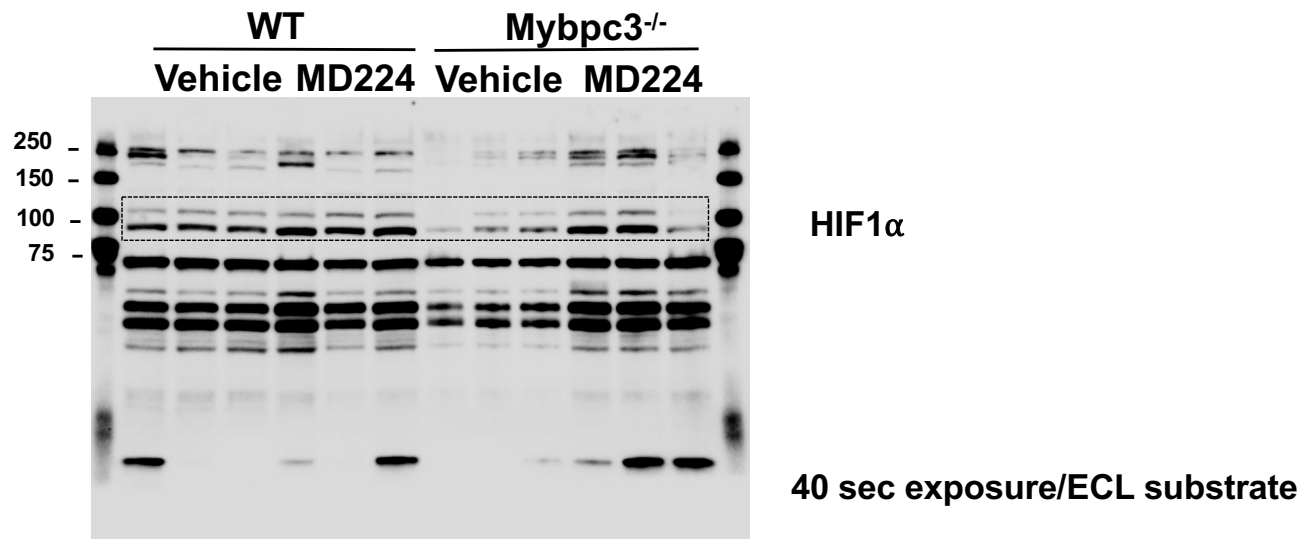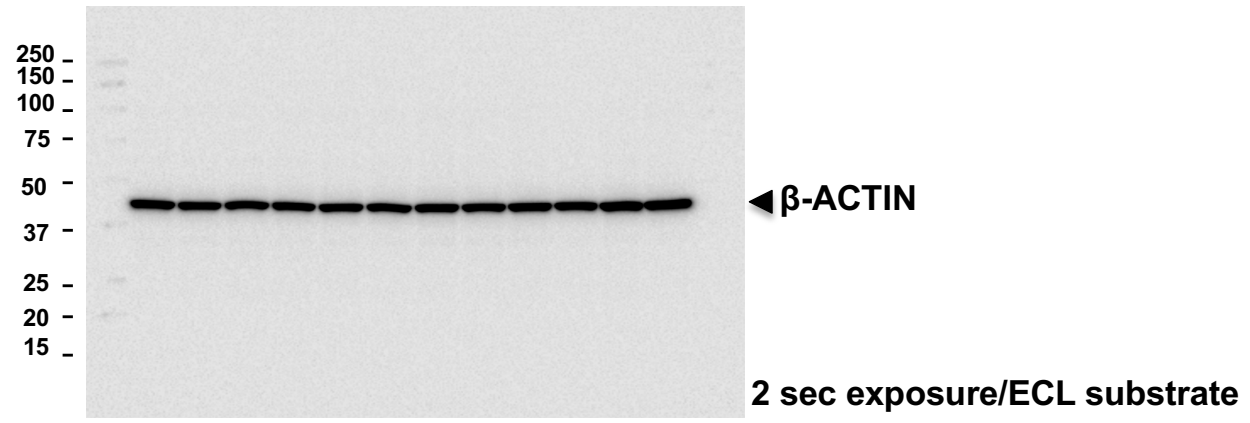

# Full unedited gel for Figure 7B

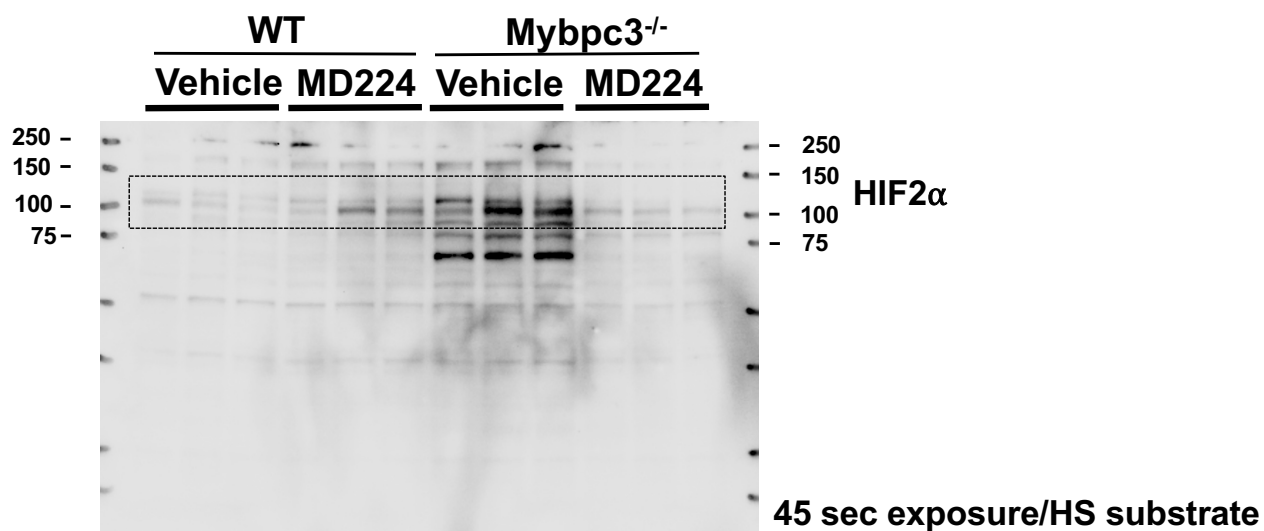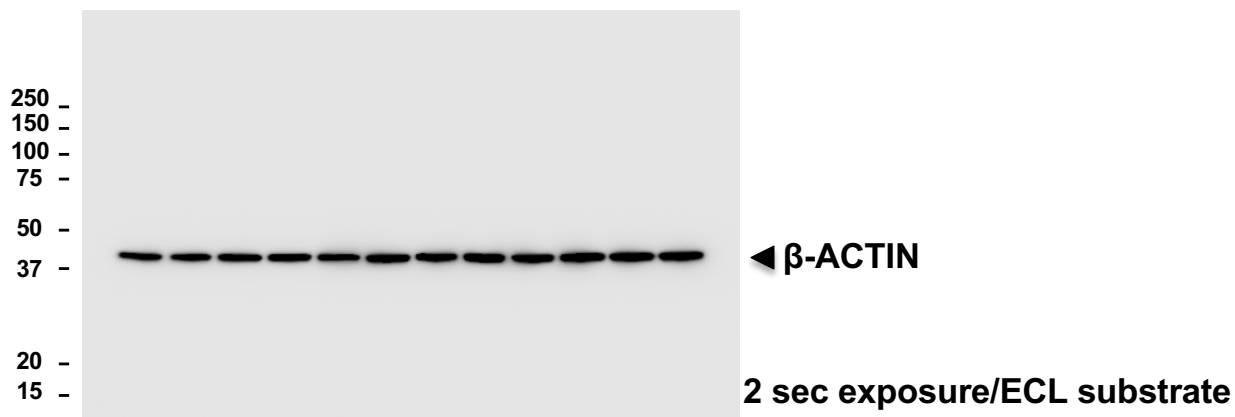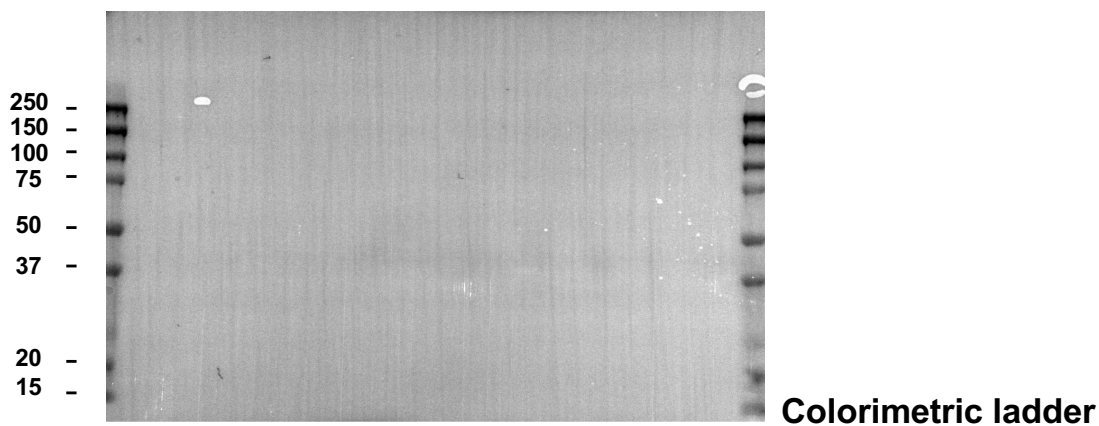

# Full unedited gel for Figure 7C

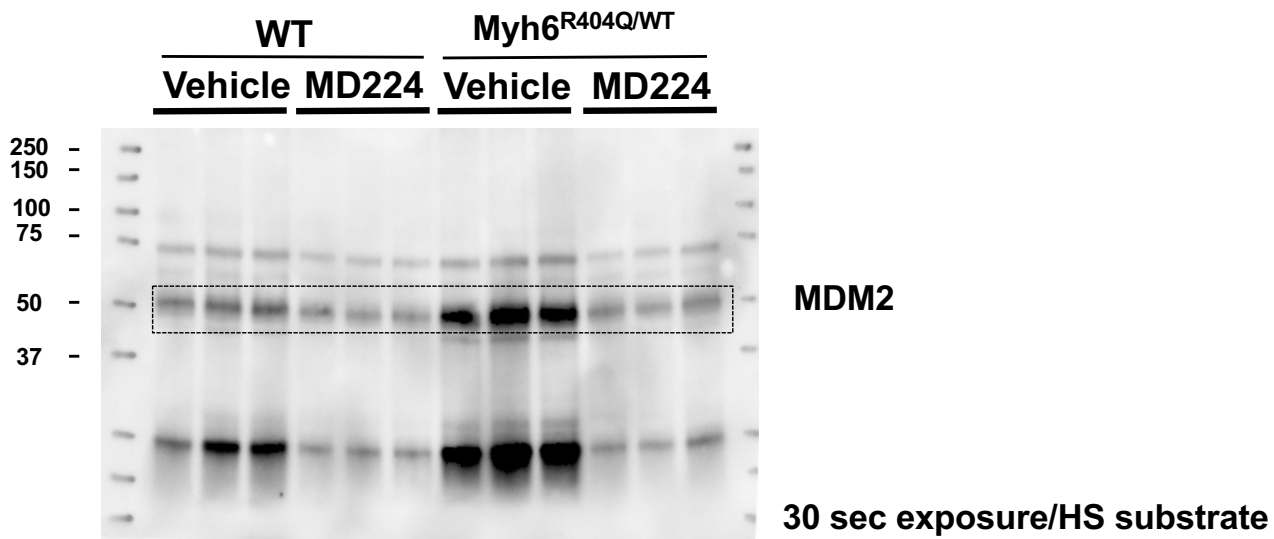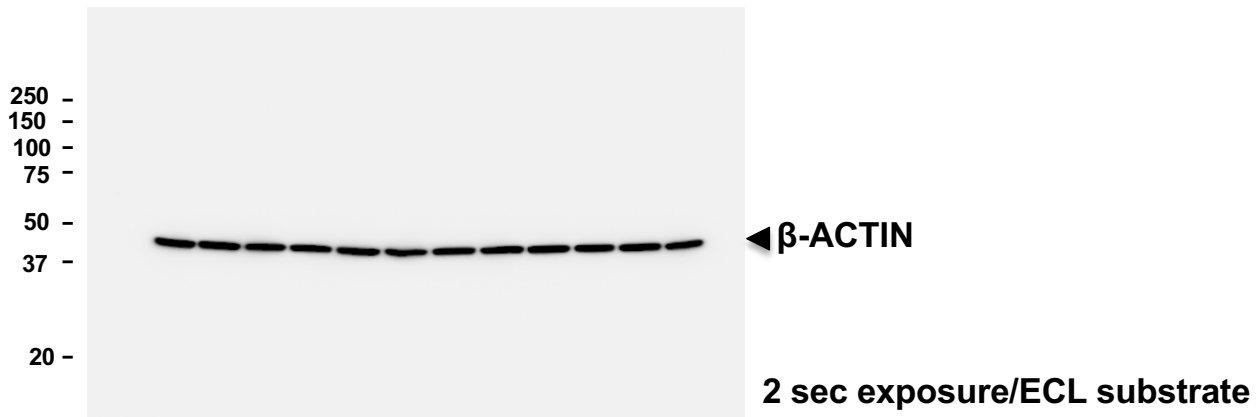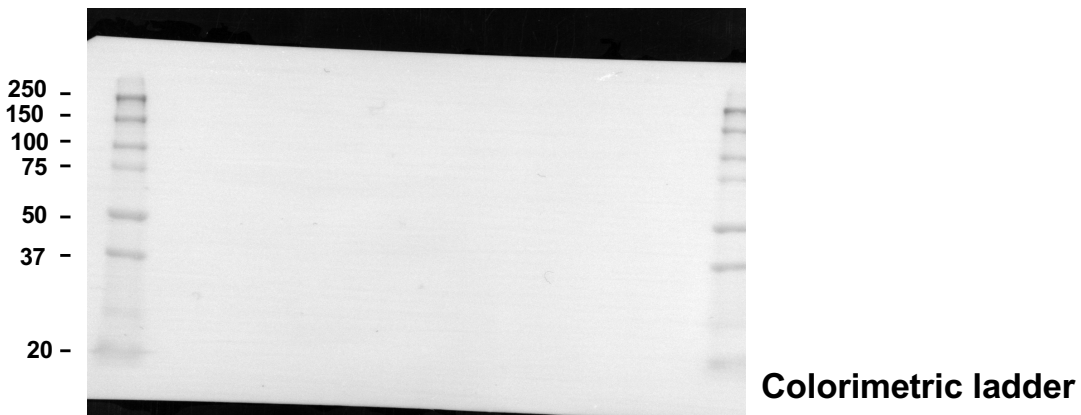

# Full unedited gel for Figure 7C

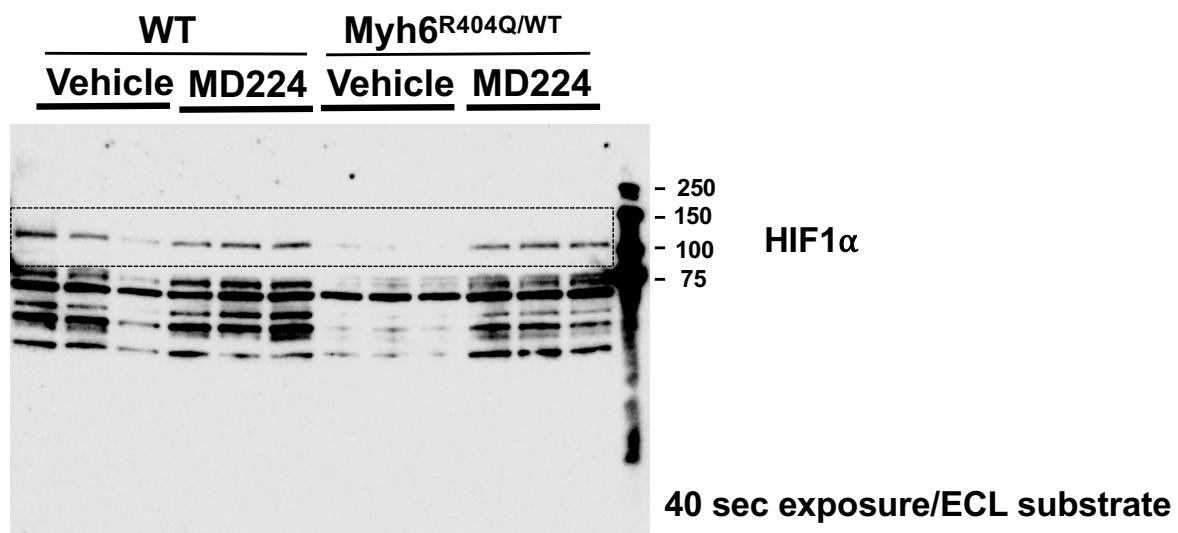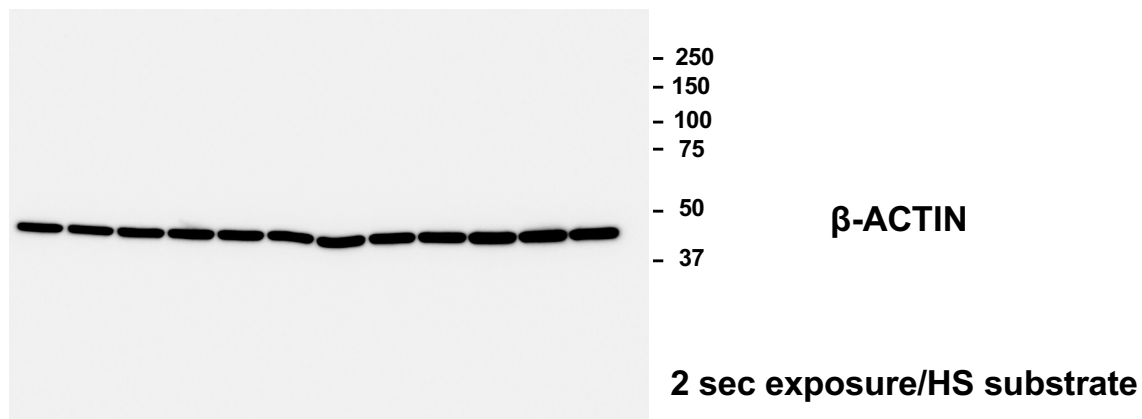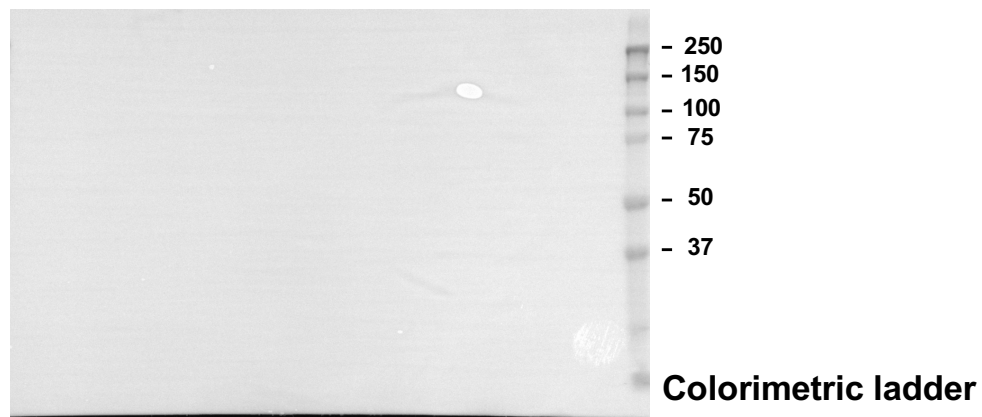

# Full unedited gel for Figure 7C

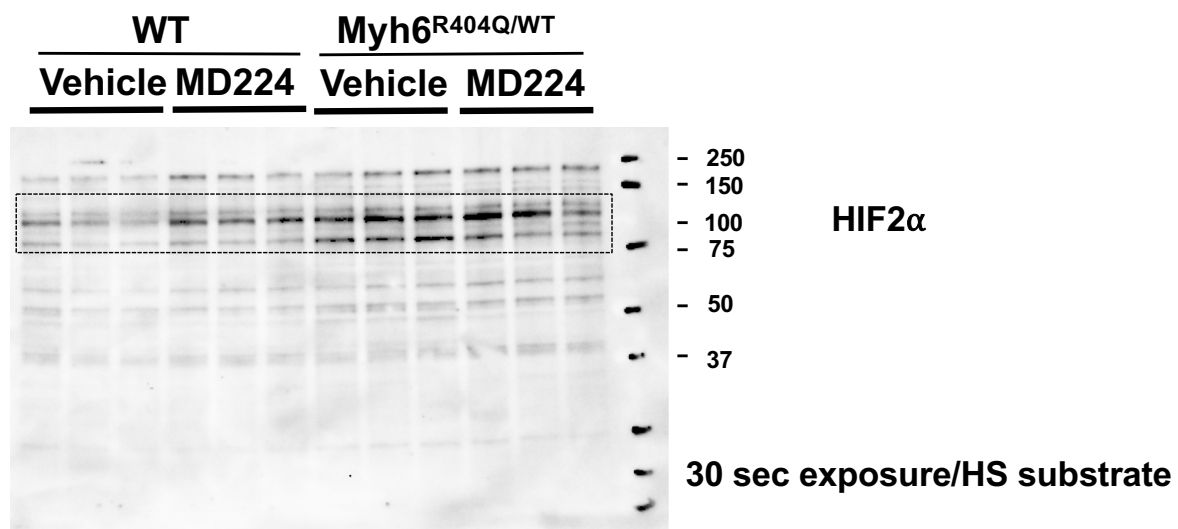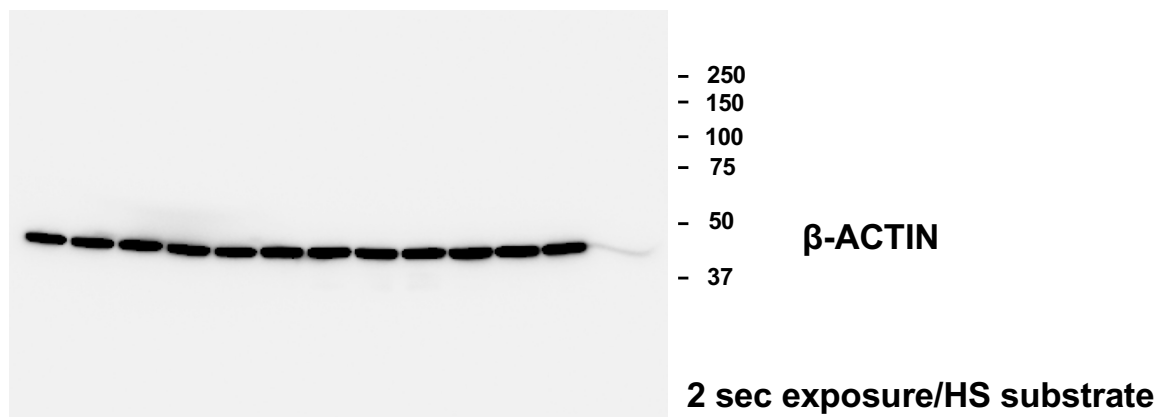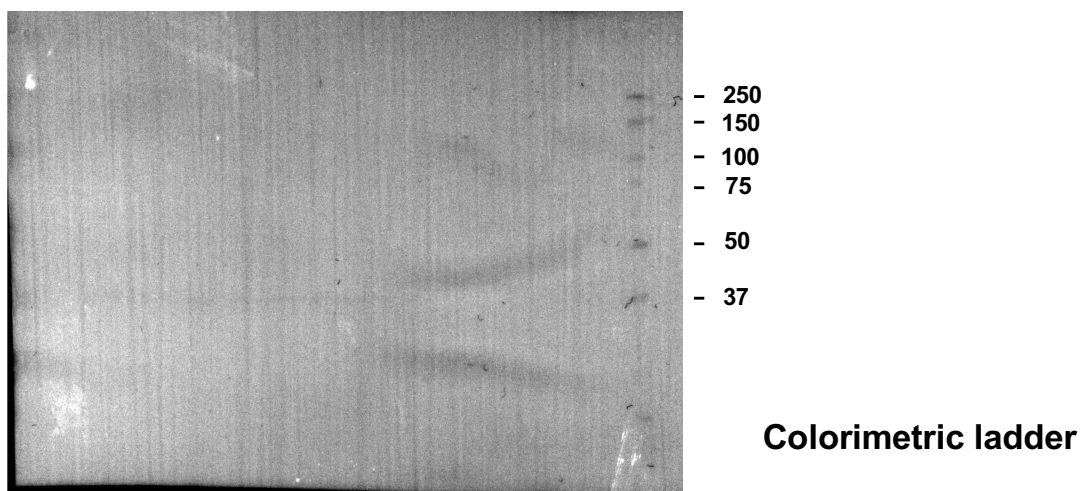

# Full unedited gel for Figure S3F

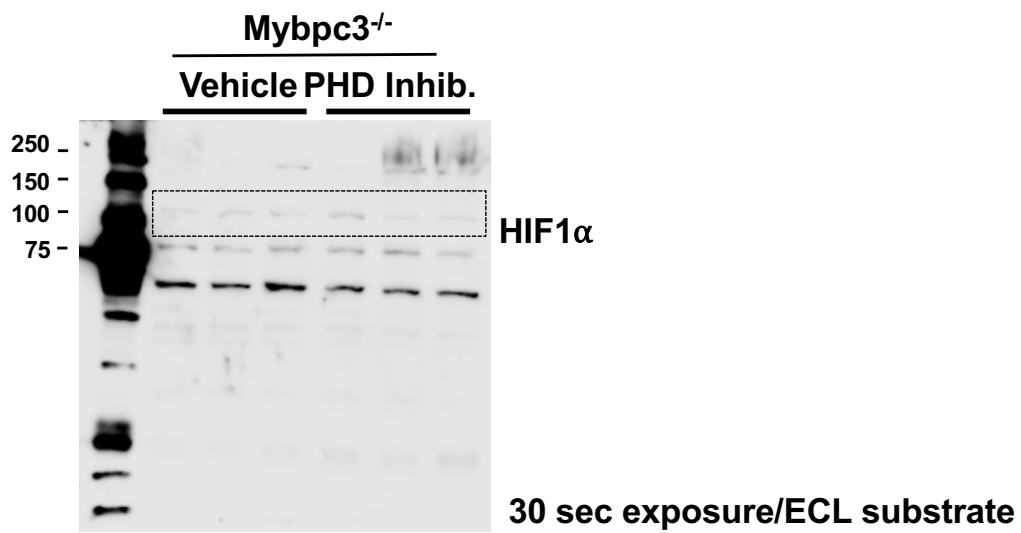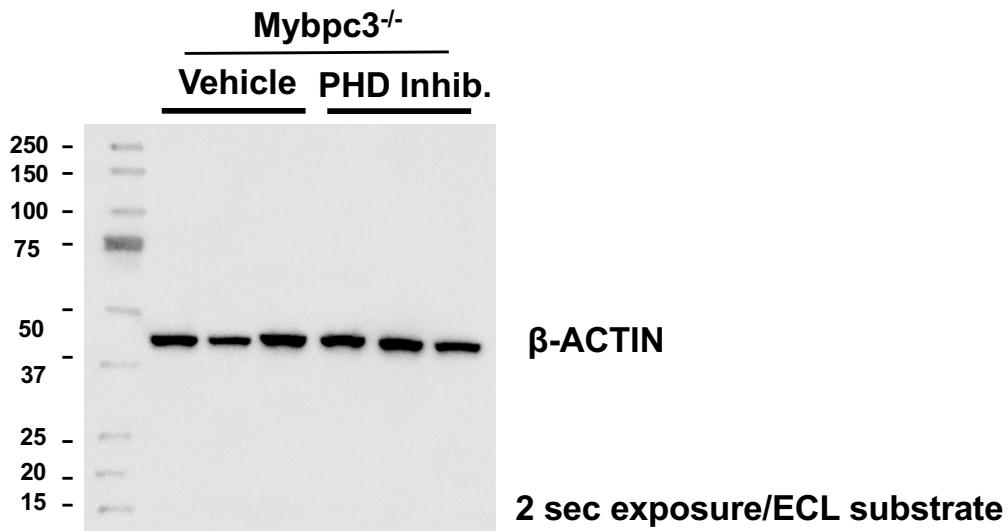

# Full unedited gel for Figure S3I

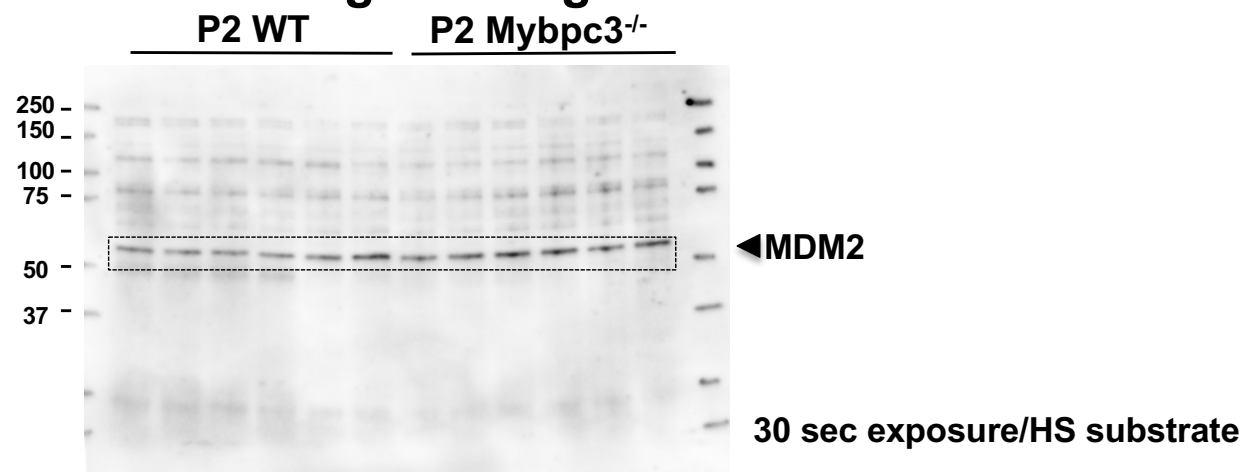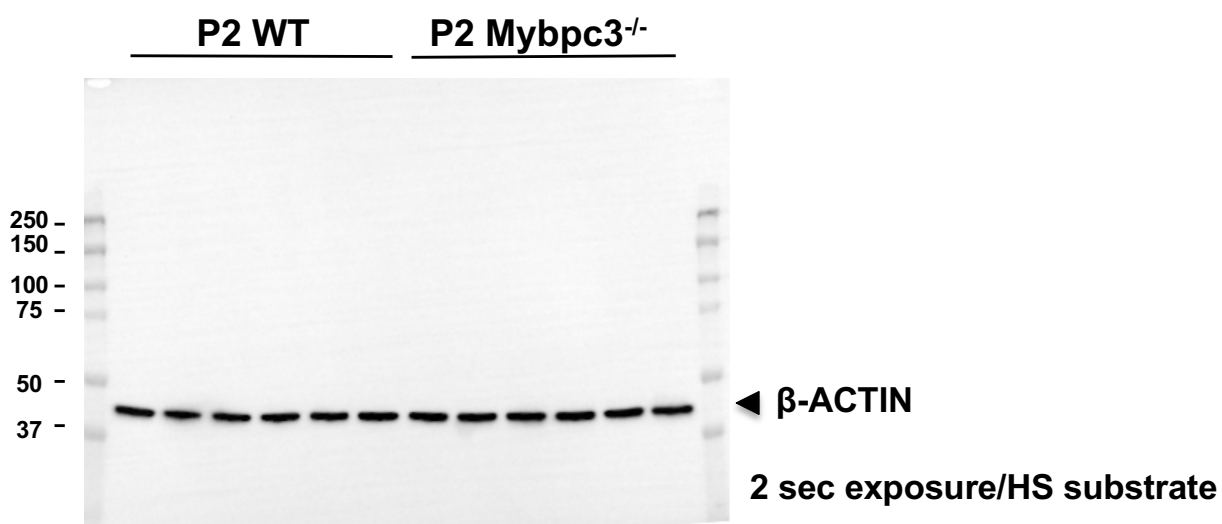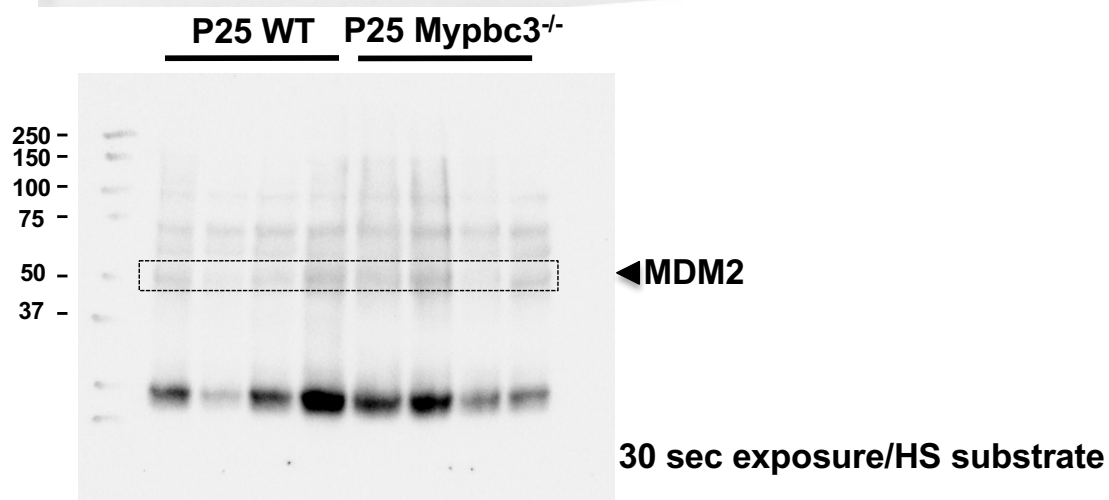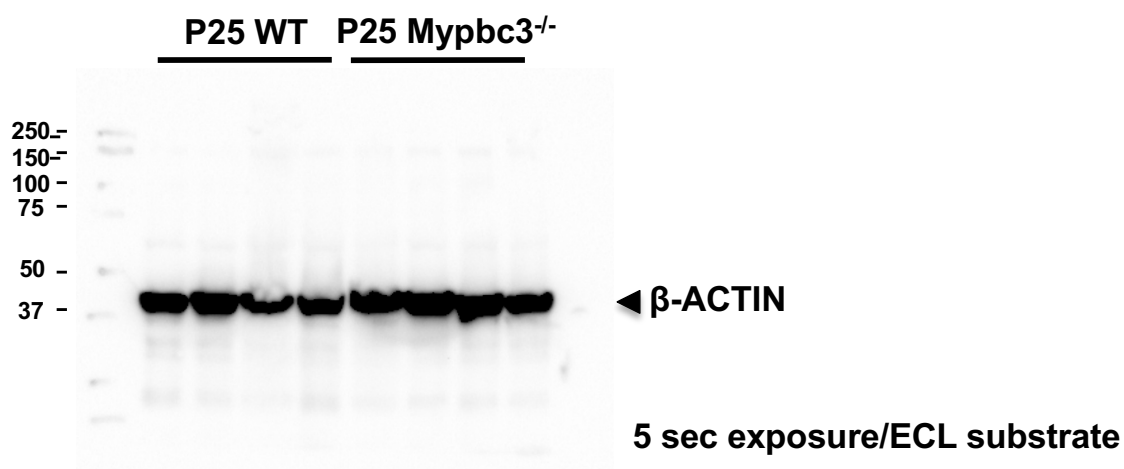

# Full unedited gel for Figure S3J

IP:MDM2

BTZ treatment

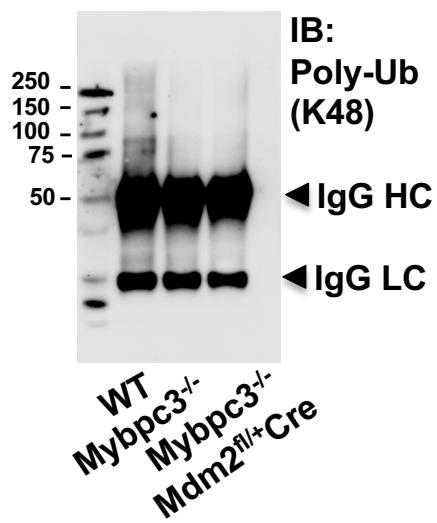

40 sec exposure/HS substrate

Input:

BTZ treatment

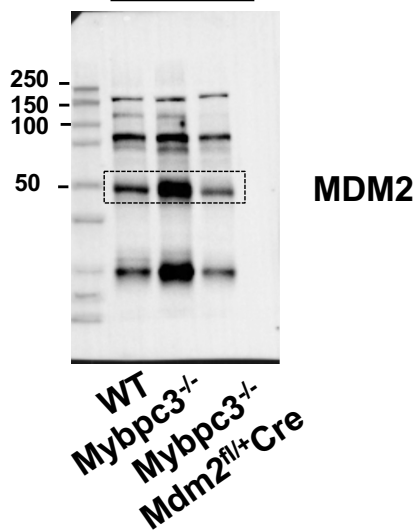

40 sec exposure/HS substrate

BTZ treatment

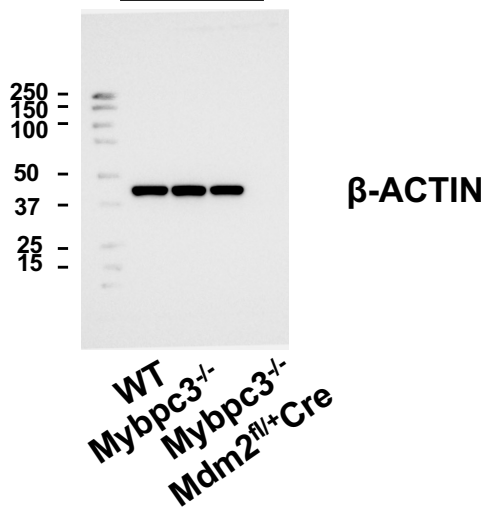

2 sec exposure/ECL substrate



# Full unedited gel for Figure S3K

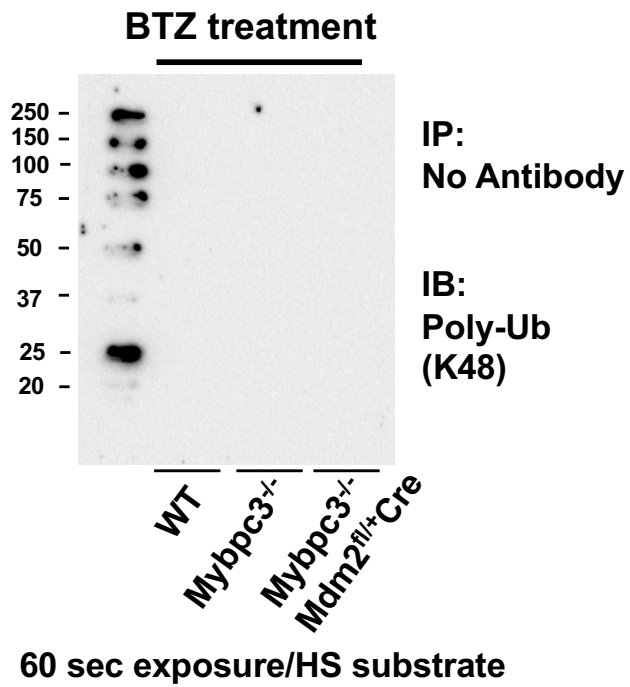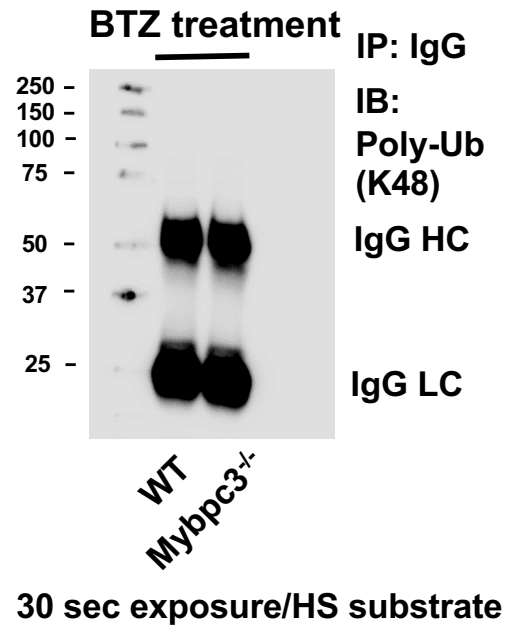

# Full unedited gel for Figure S3M

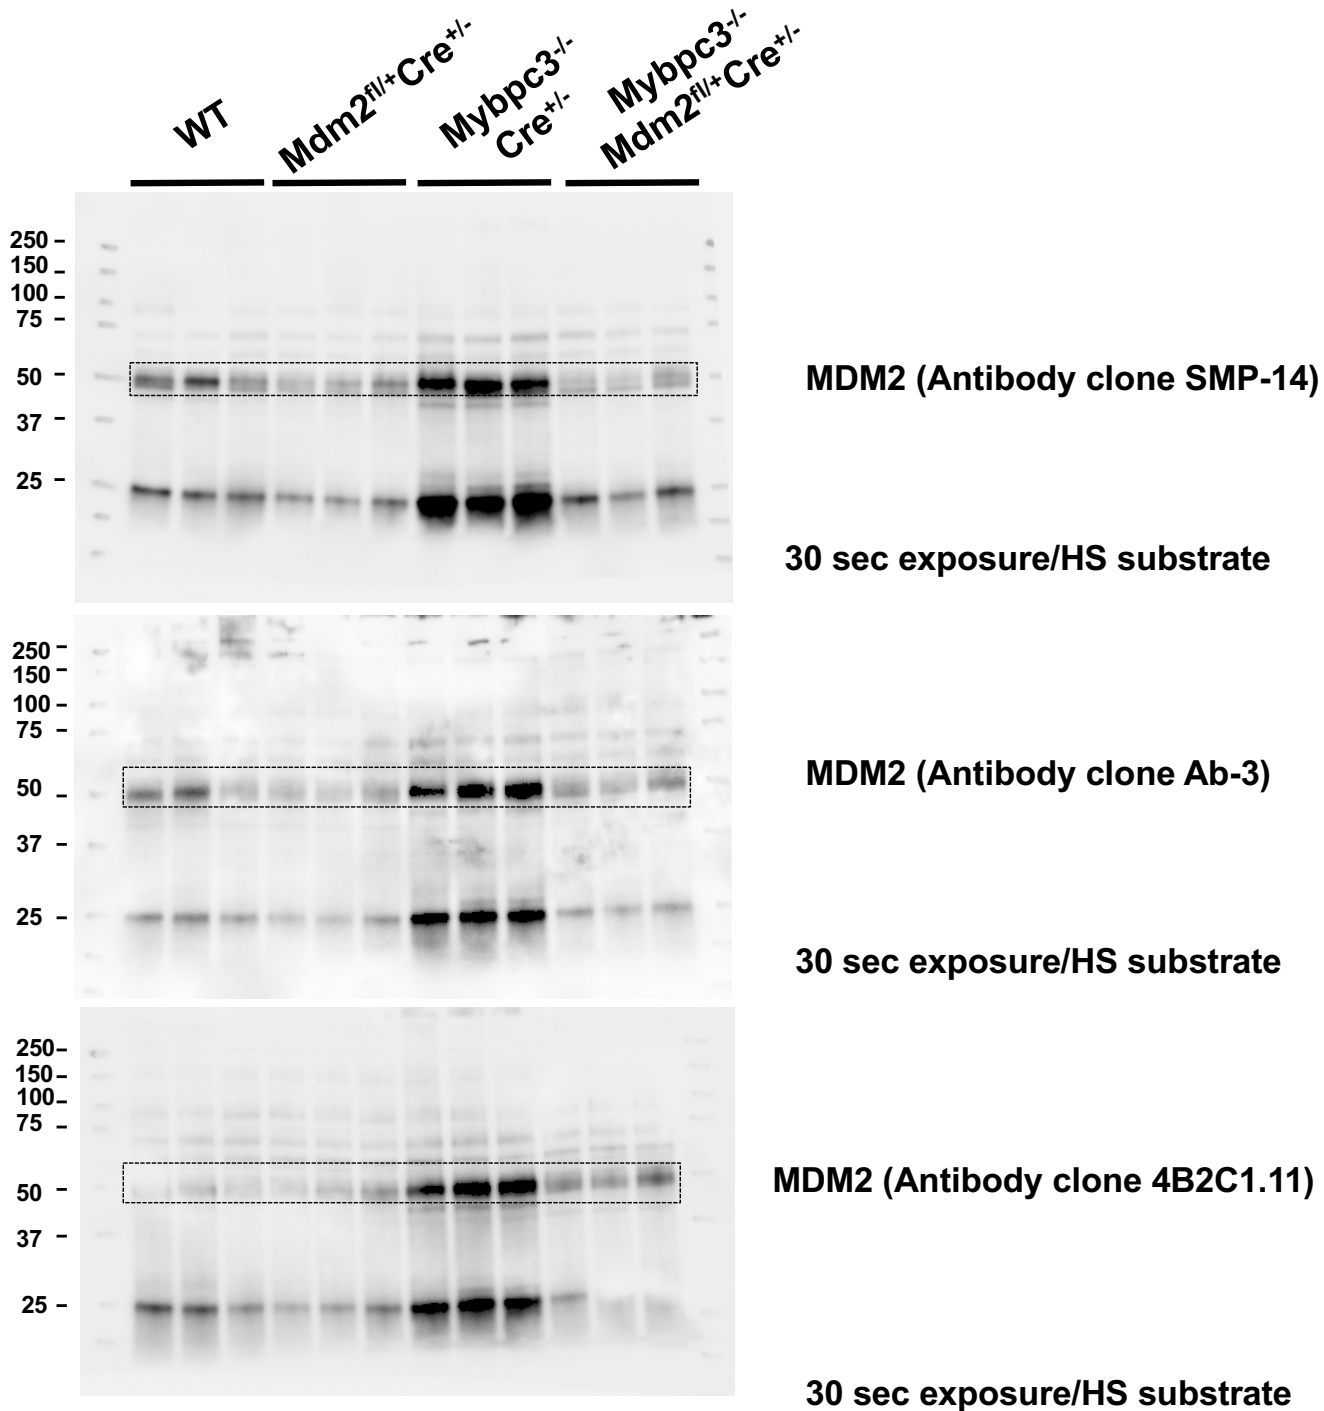

# Full unedited gel for Figure S3M

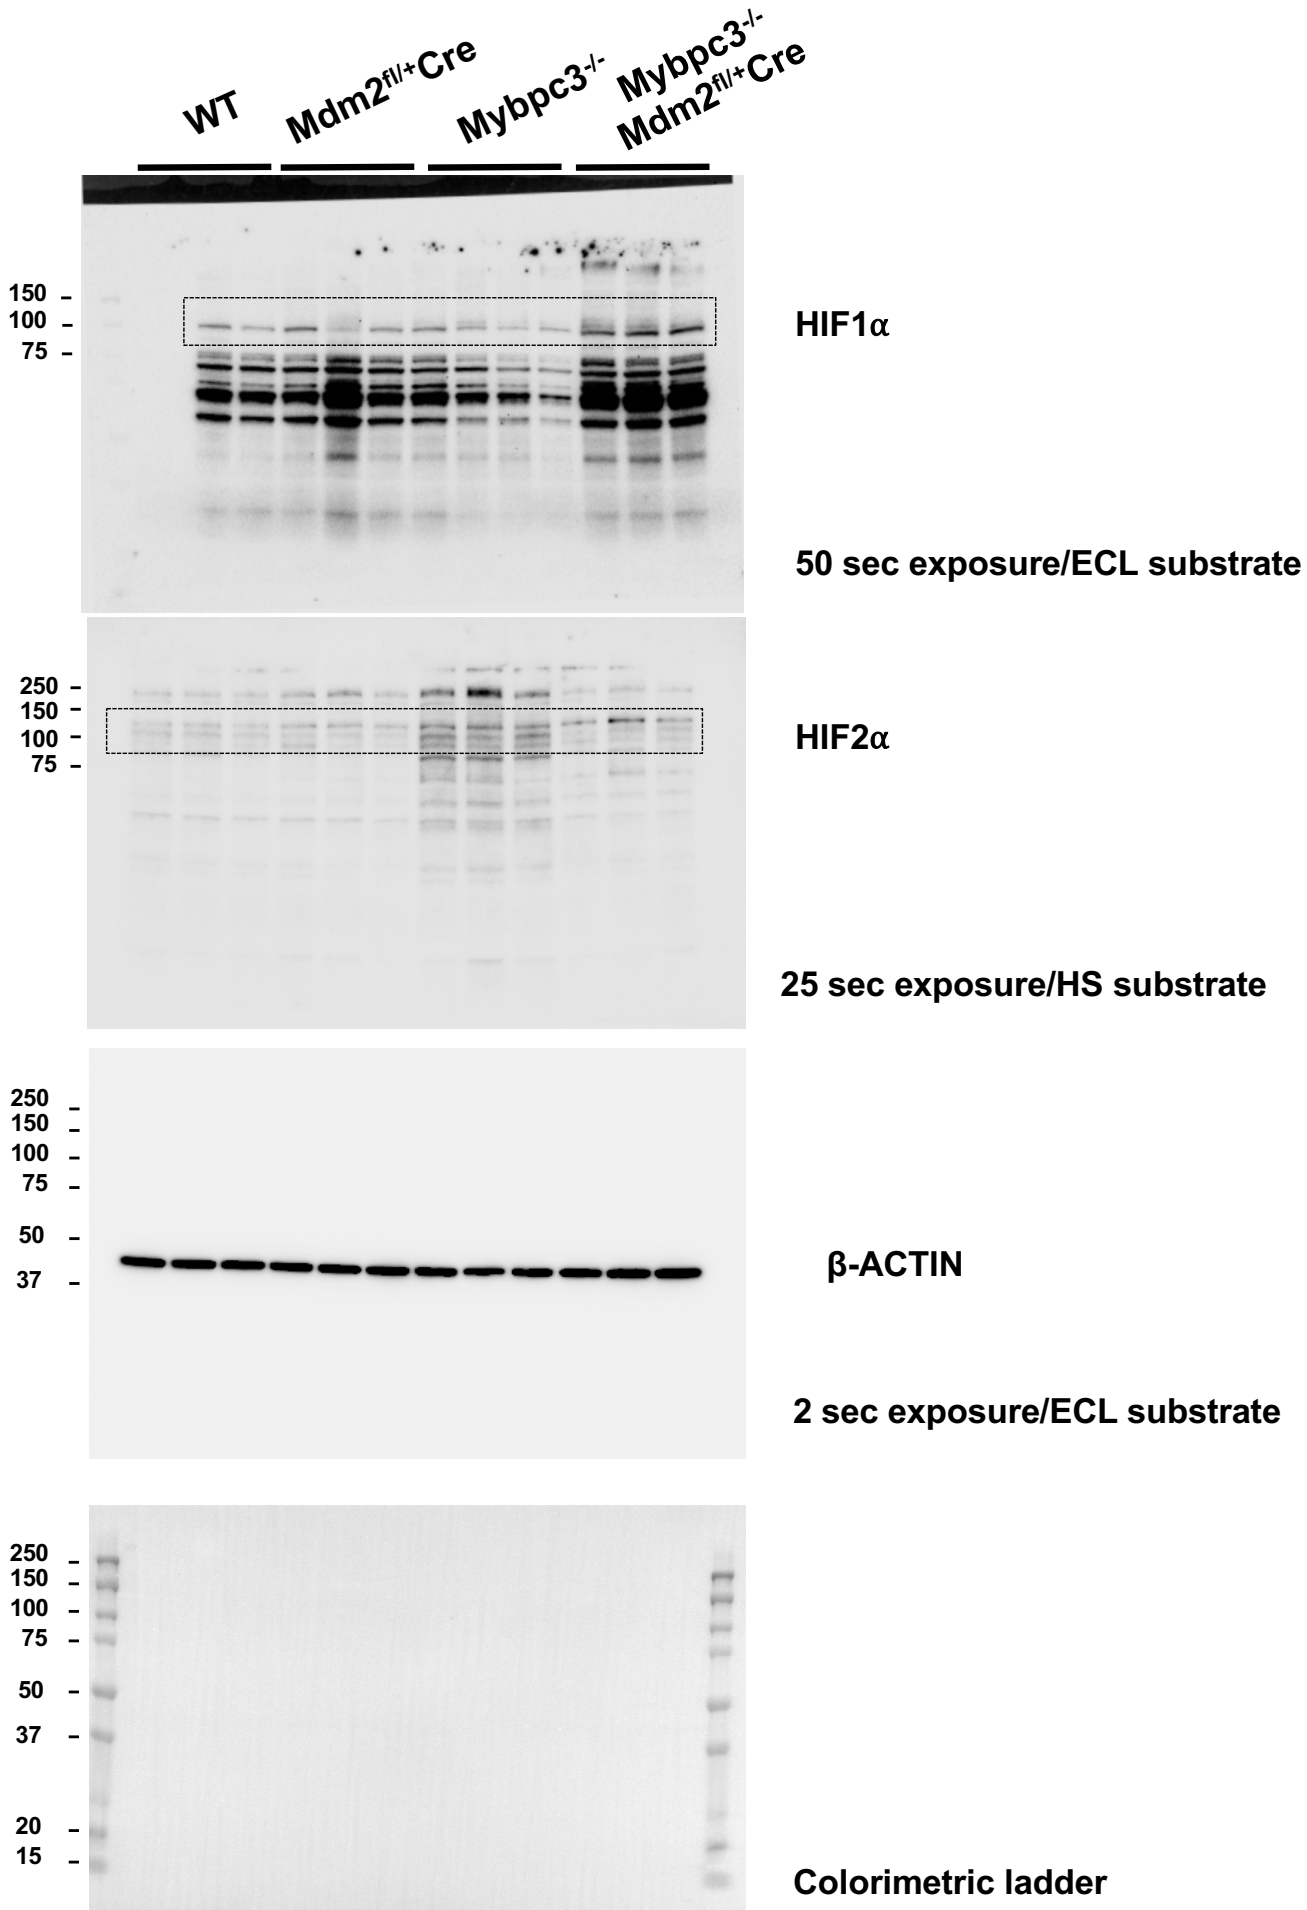

# Full unedited gel for Figure S30

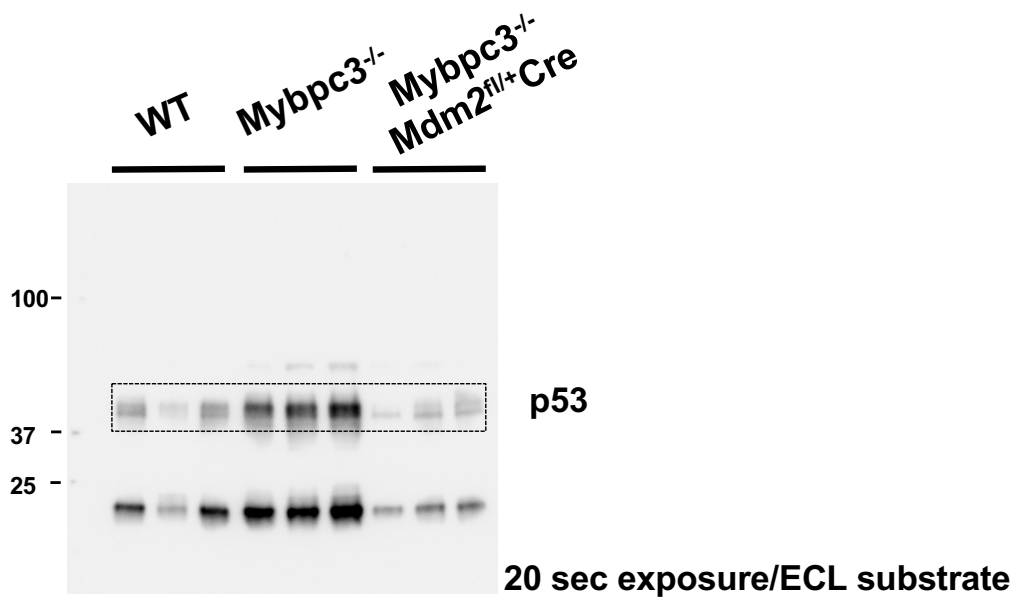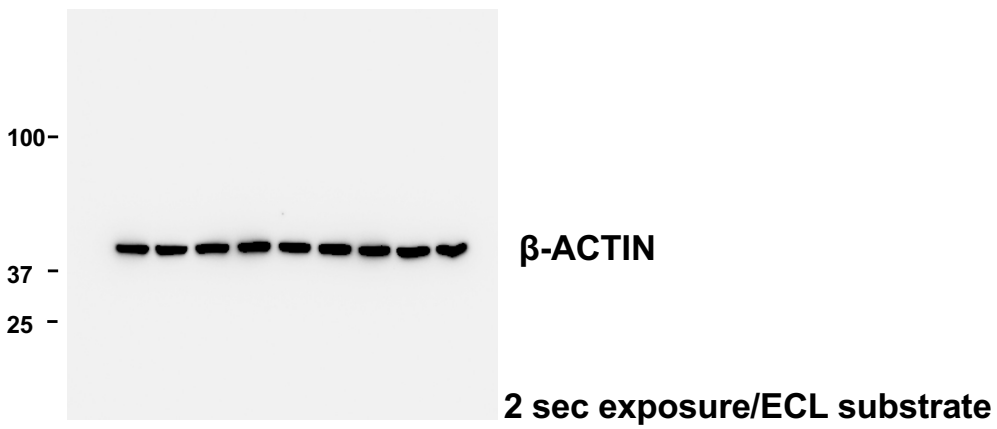

# Full unedited gel for Figure S5C

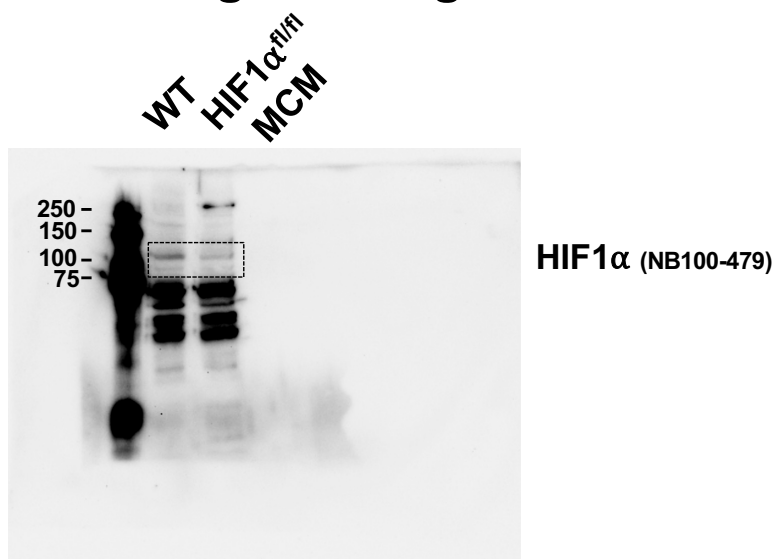

30 sec exposure/ECL substrate

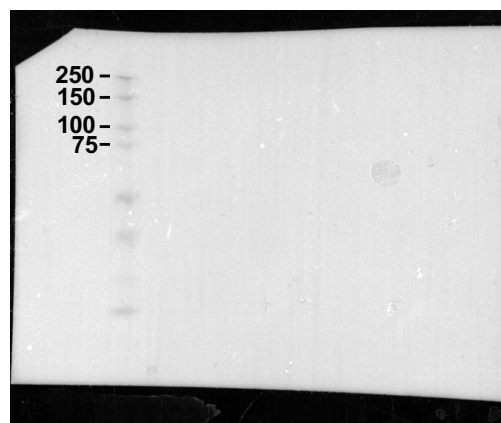

Colorimetric ladder

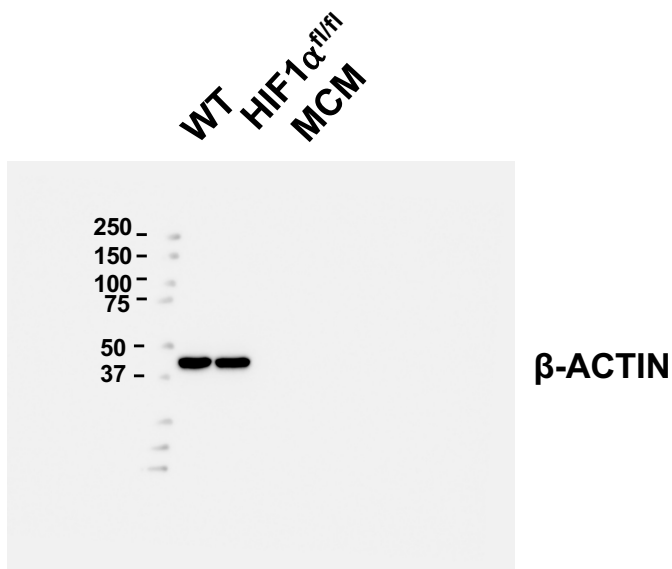

2 sec exposure/ECL substrate

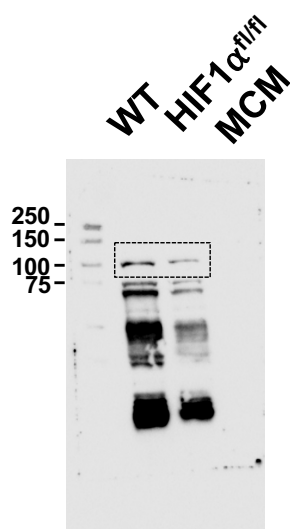

30 sec exposure  
/ECL substrate

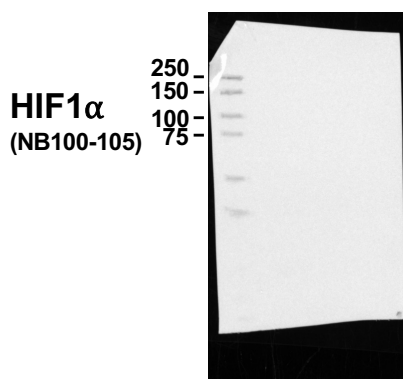

Colorimetric ladder

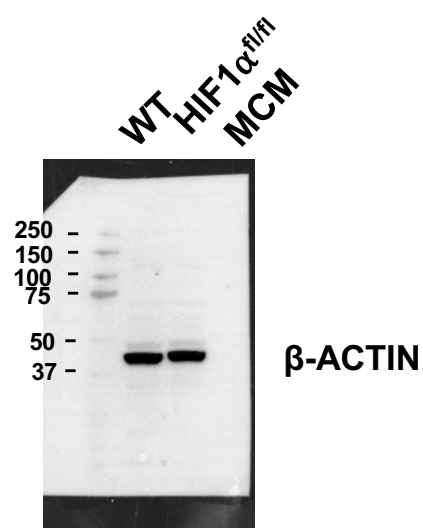

2 sec exposure/  
ECL substrate

# Full unedited gel for Figure S5D

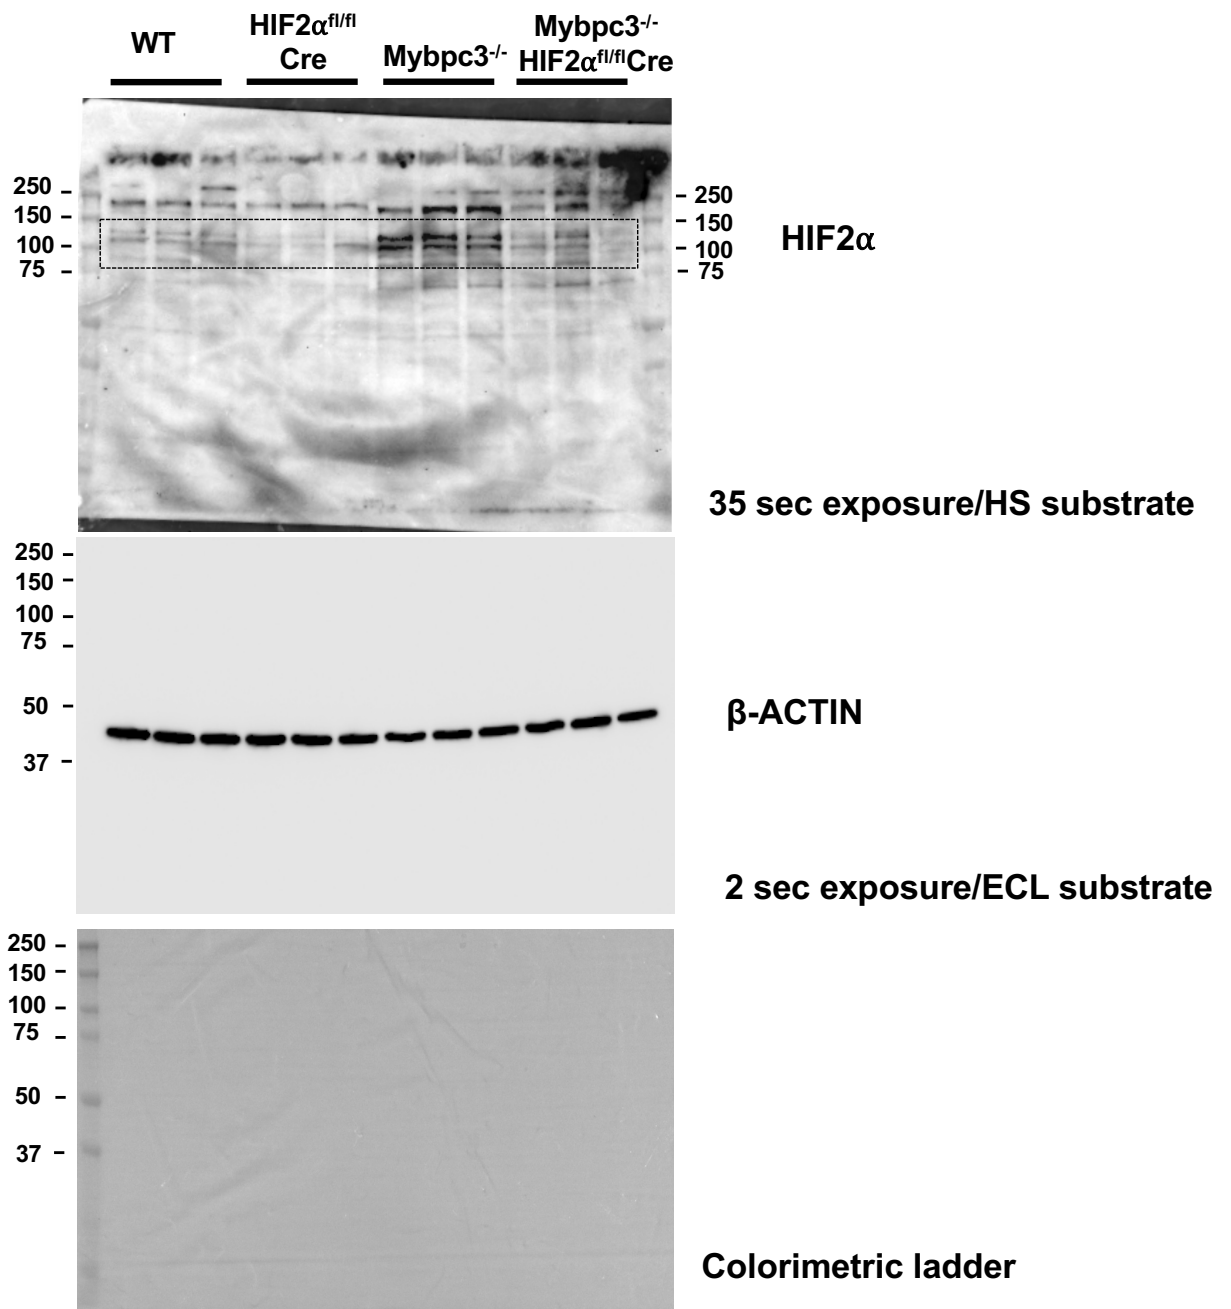

# Full unedited gel for Figure S6O

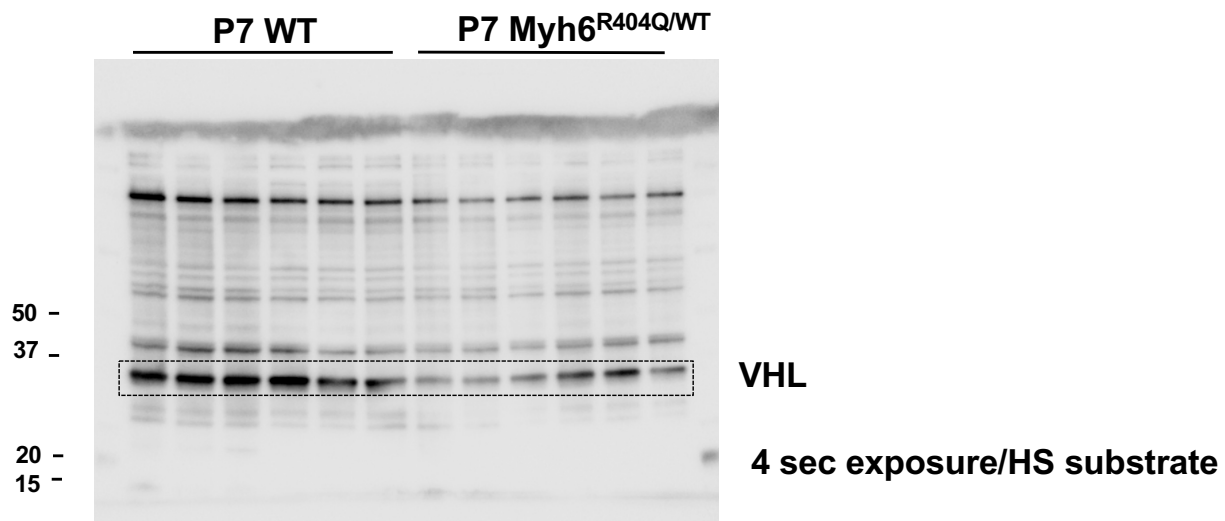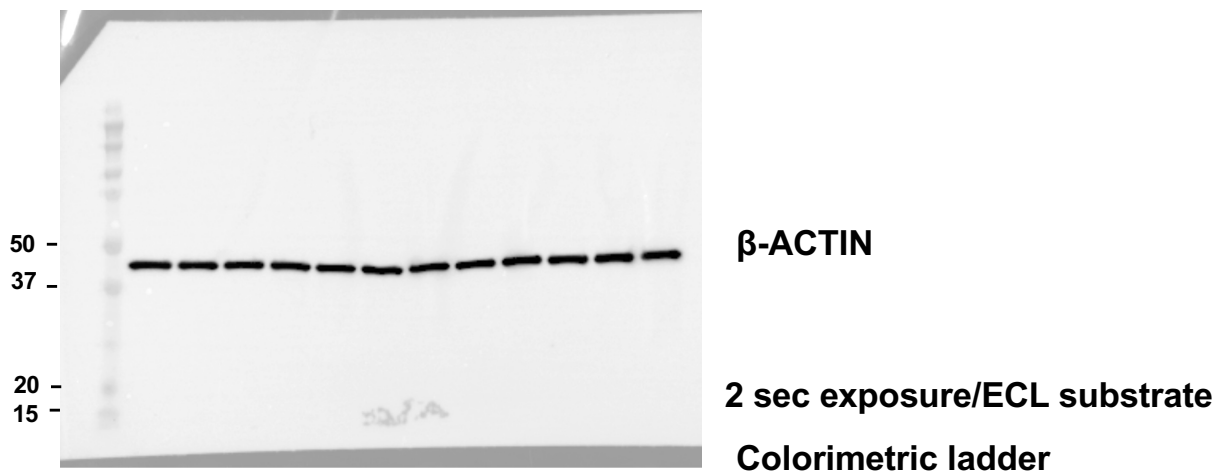

Supplement: cir-148-1870-s002.pdf [file cir-148-1870-s002.pdf]
